# Supplementary material for: Diastereoselective synthesis of substituted dihydropyrans via an oxonium–ene cyclization reaction
Source: Royal Society of Chemistry journal article supplement (doi:10.1039/c2ob26088c), 2012-01-01

## Supporting Information for Publication

### Diastereoselective Synthesis of Substituted Dihydropyrans via Oxonium- Ene Cyclization Reaction

Pipas Saha, Priya Ghosh, Sabera Sultana and Anil K. Saikia\*

Department of Chemistry, Indian Institute of Technology Guwahati, Guwahati 781039, India

Fax: +91 361 2690762; e-mail: [asaikia@iitg.ernet.in](mailto:asaikia@iitg.ernet.in)

#### Table of content:

|                                                                                                                                                               |        |
|---------------------------------------------------------------------------------------------------------------------------------------------------------------|--------|
| 1. General Information                                                                                                                                        | S1     |
| 2. <sup>1</sup> H and <sup>13</sup> C NMR spectra of all compounds , <sup>19</sup> F NMR spectrum of <b>3e</b><br>and NOE spectrum of <b>3a</b> and <b>3k</b> | S2-S53 |

**General Information:** All reagents are commercially obtained. <sup>1</sup>H NMR spectra were recorded in CDCl<sub>3</sub> on 400 MHz NMR spectrometer using TMS as internal standard. The <sup>13</sup>C and <sup>19</sup>F NMR spectra were recorded at 100 MHz and 376 MHz, respectively. For <sup>13</sup>C and <sup>19</sup>F NMR CDCl<sub>3</sub> and C<sub>6</sub>F<sub>6</sub> were used as internal standard. IR spectra were recorded on FT-IR spectrometer. Mass spectra were recorded using Waters LC-MS/MS system (Q-TOF–Premier). HRMS (ESCI-TOF) were calibrated with sodium formate solution and leucine enkephalin (SIGMA) was used as an external standard.

### <sup>1</sup>H NMR spectra of 1a

```
PS_570_M
exp1 s2pu1
SAMPLE
date Dec 30 2011 temp not used
solvent CDCl3 gain not used
file /export/home/~ spin not used
ciftemp/AKS_PS_570~ hst 0.008
M.Fid pw90 19.700
ACQUISITION alfa 20.000
sw 6389.8 FLAGS
at 1.998 il n
np 25528 in n
fb not used dp y
bs 8 hs nn
dl 1.000 PROCESSING
nt 200 lb 0.10
ct 184 fn 65536
TRANSMITTER H1 sp -263.3
sfrq 399.853 wp 3694.4
tof 362.8 rfi 792.1
tpwr 57 rfp 0
pw 9.850 rp 101.3
DECOUPLER lp -92.7
dn C13 PLOT
dof 0 wc 250
dm nnn sc 0
dmm c vs 50
dpwr 50 th 5
dmf 15900 nm cdc ph
```

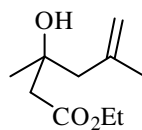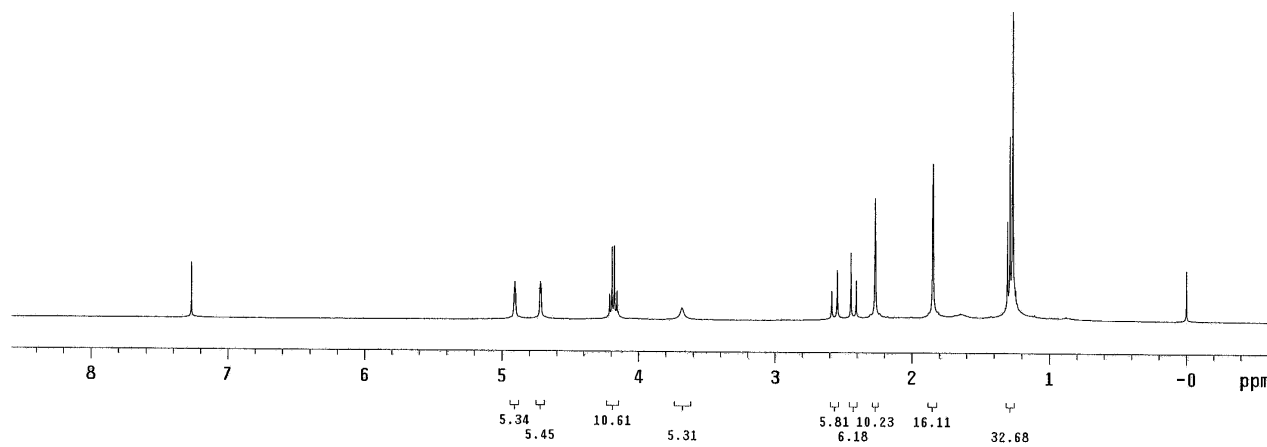

### <sup>13</sup>C NMR spectra of **1a**

PS\_570\_M

expl s2pu1

| SAMPLE      |                | SPECIAL    |          |
|-------------|----------------|------------|----------|
| date        | Jan 8 2012     | temp       | not used |
| solvent     | CDCl3          | gain       | not used |
| file        | /export/home/~ | spin       | not used |
| ciftemp     | AKS_PS_570~    | hst        | 0.008    |
|             | M_C13.fid      | pw90       | 18.000   |
|             | alfa           |            | 20.000   |
| ACQUISITION |                | FLAGS      |          |
| sw          | 25125.6        |            |          |
| at          | 1.199          | fl         | n        |
| np          | 60270          | in         | n        |
| fb          | 13800          | dp         | y        |
| bs          | 16             | hs         | nn       |
| d1          | 1.000          | PROCESSING |          |
| nt          | 2000           | lb         | 2.00     |
| ct          | 384            | fn         | 65536    |
| TRANSMITTER |                | DISPLAY    |          |
| tn          | C13            | sp         | -527.2   |
| sfrq        | 100.554        | wp         | 21295.5  |
| tof         | 1536.3         | rf1        | 9282.1   |
| tpwr        | 61             | rfp        | 7764.9   |
| pw          | 9.300          | rp         | -62.5    |
|             | DECOUPLER      | lp         | -334.9   |
|             |                | PLOT       |          |
| dn          | H1             |            |          |
| dof         | 0              | wc         | 250      |
| dm          | yyv            | sc         | 0        |
| dmm         | w              | vs         | 10       |
| dpwr        | 42             | th         | 2        |
| dmf         | 8900           | nm         | no       |
|             |                | ph         |          |

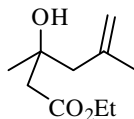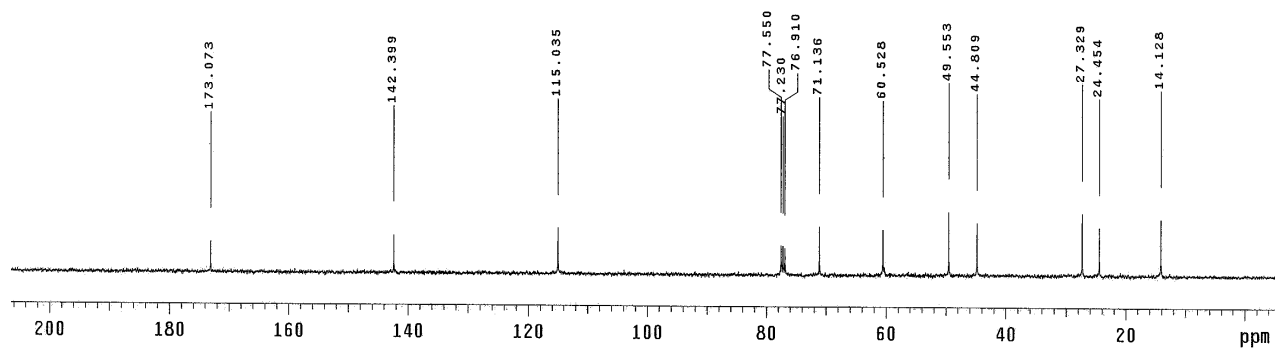

### <sup>1</sup>H NMR spectra of **1b**

PS\_577\_M

exp1 std1h

| SAMPLE              |                | SPECIAL    |          |
|---------------------|----------------|------------|----------|
| date                | Jan 16 2012    | temp       | not us   |
| solvent             | CDCl3          | gain       | not us   |
| file                | /export/home/~ | spin       | not us   |
| ciftemp/AKS_PS_577~ |                | hst        | 0.008    |
|                     | M_fid          | pw90       | 19.700   |
|                     | a1fa           |            | 20.000   |
| ACQUISITION         |                | FLAGS      |          |
| sw                  | 6006.0         |            |          |
| at                  | 1.995          | il         | n        |
| np                  | 23964          | in         | n        |
| fb                  | not used       | dp         | y        |
| bs                  | 8              | hs         | nn       |
| d1                  | 1.000          | PROCESSING |          |
| nt                  | 200            | fn         | not used |
| ct                  | 200            | DISPLAY    |          |
| TRANSMITTER         |                | sp         | -213.4   |
| tn                  | H1             | wp         | 3677.7   |
| sfrq                | 399.853        | rfl        | 963.1    |
| tof                 | 0              | rfp        | 0        |
| tpwr                | 57             | rp         | 97.8     |
| pw                  | 7.000          | lp         | -79.9    |
| DECOUPLER           |                | PLOT       |          |
| dn                  | C13            | wc         | 250      |
| dof                 | 0              | sc         | 0        |
| dm                  | nnh            | vs         | 19       |
| dmm                 | c              | th         | 10       |
| dpwr                | 50             | nm         | cdc ph   |
| dmf                 | 15900          |            |          |

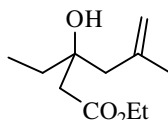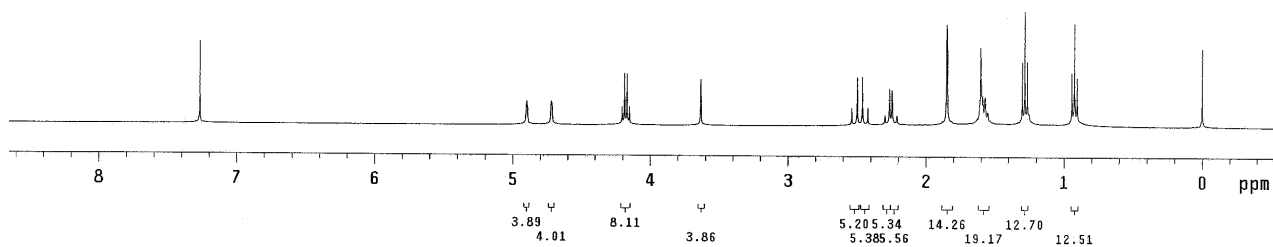

$^{13}\text{C}$  NMR spectra of **1b**

```
PS_577_M
expl s2pu1
SAMPLE SPECIAL
date Jan 18 2012 temp not used
solvent CDCl3 gain not used
file /export/home/~ spin not used
ciftemp/AKS_PS_577~ nst 0.008
M_C13.fid pw90 18.600
ACQUISITION alfa 20.000
sw 25125.6 FLAGS
at 1.199 fl n
np 60270 fn n
fb 13000 dp y
bs 16 hs nn
di 1.000 PROCESSING
nt 3000 lb 2.00
ct 1408 fn 65536
TRANSMITTER DISPLAY
tn C13 sp -484.3
sfrq 100.554 wp 21196.6
tof 1536.3 rfl 9272.1
tpwr 61 rfp 7764.9
pw 9.300 rp -91.1
DECOUPLER lp -271.4
dn H1 PLOT
dof 0 wc 250
dm yyy sc 0
dmm w vs 13
dpwr 42 th 2
dmf 8900 nm no ph
```

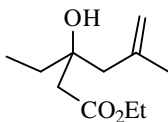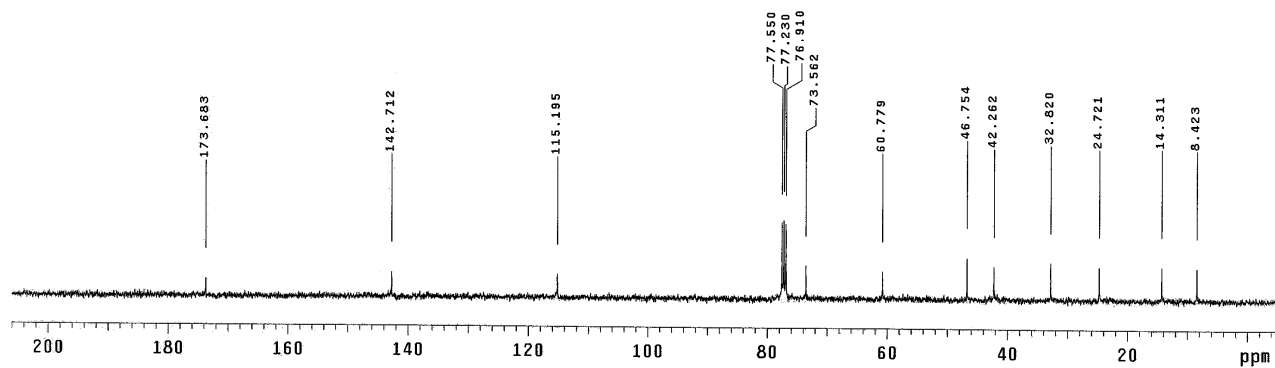

### <sup>1</sup>H NMR spectra of 3a

PS\_573\_M

exp1 s2pu1

|                     |                |            |          |
|---------------------|----------------|------------|----------|
| SAMPLE              |                | SPECIAL    |          |
| date                | Feb 5 2012     | temp       | not used |
| solvent             | CDCl3          | gain       | not used |
| file                | /export/home/~ | spin       | not used |
| ciftemp/AKS_PS_573~ |                | hst        | 0.008    |
| M_Pdt.fid           |                | pw90       | 19.700   |
| ACQUISITION         |                | alpha      | 20.000   |
| sv                  | 6389.8         | FLAGS      |          |
| at                  | 1.998          | il         | n        |
| np                  | 25528          | in         | n        |
| fb                  | not used       | dp         | y        |
| bs                  | 8              | hs         | nn       |
| di                  | 1.000          | PROCESSING |          |
| nt                  | 200            | lb         | 0.10     |
| ct                  | 160            | fn         | 65536    |
| TRANSMITTER         |                | DISPLAY    |          |
| tn                  | H1             | sp         | -232.6   |
| effrq               | 399.853        | wp         | 3652.5   |
| cof                 | 362.8          | rf1        | 795.0    |
| tpwr                | 57             | rfp        | 0        |
| pw                  | 9.850          | rp         | 110.4    |
| DECOUPLER           |                | lp         | -98.1    |
| dn                  | C13            | PLOT       |          |
| dof                 | 0              | wc         | 250      |
| dm                  | nmn            | sc         | 0        |
| dmm                 | c              | vs         | 24       |
| dpwr                | 50             | th         | 13       |
| dmf                 | 15900          | nm         | cdc ph   |

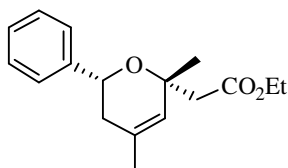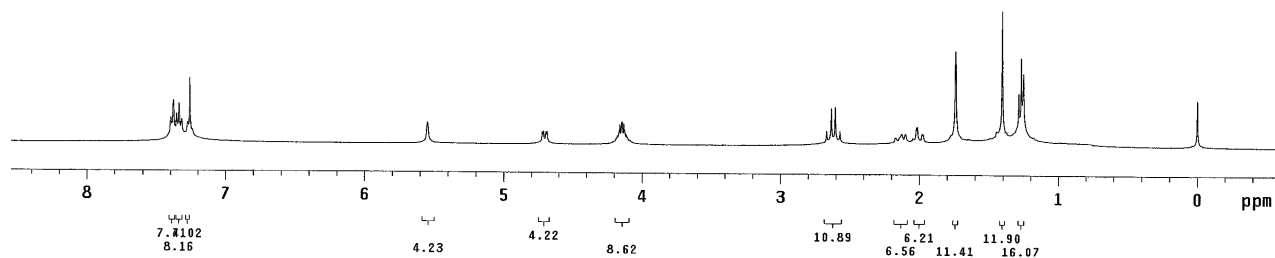

$^{13}\text{C}$  NMR spectra of **3a**

PS\_573\_M

expl s2pu1

| SAMPLE      |                   | SPECIAL    |          |
|-------------|-------------------|------------|----------|
| date        | Jan 8 2012        | temp       | not used |
| solvent     | CDCl <sub>3</sub> | gain       | not used |
| file        | /export/home/~    | spin       | not used |
| ciftemp     | AKS_PS_573        | hst        | 0.008    |
|             | M_C13.fid         | pv90       | 18.600   |
| ACQUISITION |                   | alfa       | 20.000   |
| sw          | 25125.6           | FLAGS      |          |
| at          | 1.199             | fl         | n        |
| np          | 69270             | in         | n        |
| Fb          | 13800             | dp         | y        |
| bs          | 16                | hs         | nn       |
| d1          | 1.000             | PROCESSING |          |
| nt          | 4000              | lb         | 2.00     |
| ct          | 1808              | fn         | 65536    |
| TRANSMITTER |                   | DISPLAY    |          |
| tn          | C13               | sp         | -498.1   |
| sfrq        | 100.554           | wp         | 21328.5  |
| tof         | 1536.3            | rfl        | 9285.9   |
| tpwr        | 61                | rfp        | 7764.9   |
| pw          | 9.300             | rp         | -56.9    |
| DECOUPLER   |                   | lp         | -369.4   |
| dn          | H1                | PLOT       |          |
| dof         | 0                 | wc         | 250      |
| dm          | yvy               | sc         | 0        |
| dmm         | w                 | vs         | 12       |
| dpwr        | 42                | th         | 3        |
| dmf         | 8900              | nm         | no ph    |

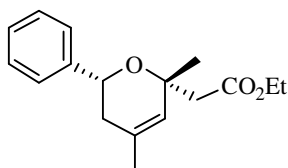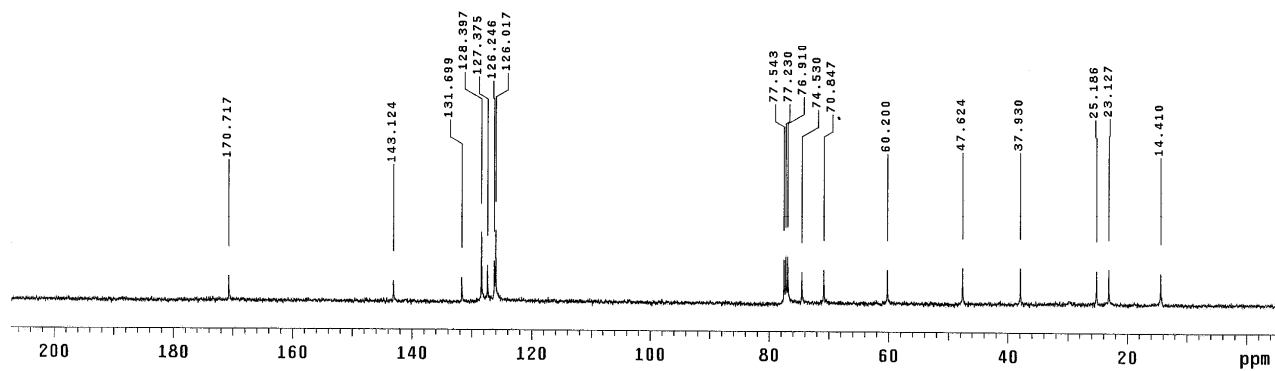

<sup>1</sup>H NMR spectra of **3b**

```
PS_579_M
exp1 s2pu1
SAMPLE
date Jan 23 2012 temp not used
solvent CDCl3 gain not used
file /export/home/~ spin not used
ciftemp/AKS_PS_579~ hst 0.008
M.Fid pu80 13.700
a1ra 20.000
ACQUISITION
sw 6389.8 FLAGS
at 1.998 f1 n
np 25528 in n
fb not used dp y
bs 8 hs nn
d1 1.000 PROCESSING
nt 200 lb 0.10
ct 200 fn 65536
TRANSMITTER
tn H1 sp DISPLAY -206.7
sfrq 399.853 wp 3610.3
tof 362.8 rf1 794.5
tpwr 57 rfp 0
pw 9.850 rp 101.1
DECOUPLER C13 lp -83.6
dn C13 PLOT
dof 0 wc 250
dm nnn sc 0
dmm c vs 22
dpwr 50 th 20
dmf 15900 nm cdc ph
```

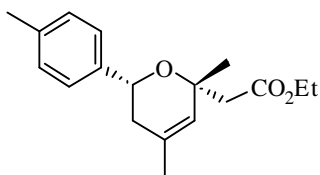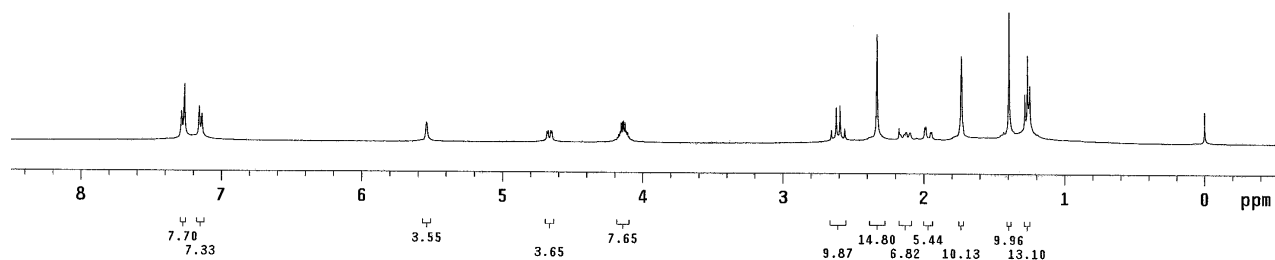



$^{13}\text{C}$  NMR spectra of **3b**

PS\_579\_M

exp1 s2pu1

| SAMPLE      |                   | SPECIAL    |          |
|-------------|-------------------|------------|----------|
| date        | Jan 22 2012       | temp       | not used |
| solvent     | CDCl <sub>3</sub> | gain       | not used |
| file        | /export/home/     | spin       | not used |
| ciftemp     | AKS_PS_579~       | hst        | 0.008    |
|             | M_C13.fid         | pw90       | 18.600   |
|             | alfa              |            | 20.000   |
| ACQUISITION |                   | FLAGS      |          |
| sw          | 25125.6           |            | n        |
| at          | 1.199             | il         | n        |
| np          | 60270             | in         | n        |
| fb          | 13800             | dp         | y        |
| bs          | 16                | hs         | nn       |
| dl          | 1.000             | PROCESSING |          |
| nt          | 4000              | lb         | 2.00     |
| ct          | 1072              | fn         | 65536    |
| TRANSMITTER |                   | DISPLAY    |          |
| tn          | C13               | sp         | -399.9   |
| sfrq        | 100.554           | wp         | 21096.9  |
| tof         | 1536.3            | rfl        | 9286.7   |
| tpwr        | 61                | rfp        | 7764.9   |
| pw          | 9.300             | rp         | -54.8    |
| DECOUPLER   |                   | PLOT       |          |
| dn          | H1                | lp         | -357.3   |
| dof         | 0                 | wc         | 250      |
| dm          | yyv               | sc         | 0        |
| dmm         | w                 | vs         | 11       |
| dpwr        | 42                | th         | 4        |
| dmf         | 8900              | nm         | no ph    |

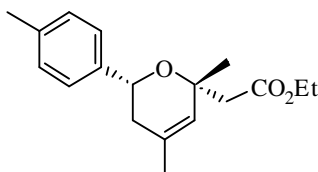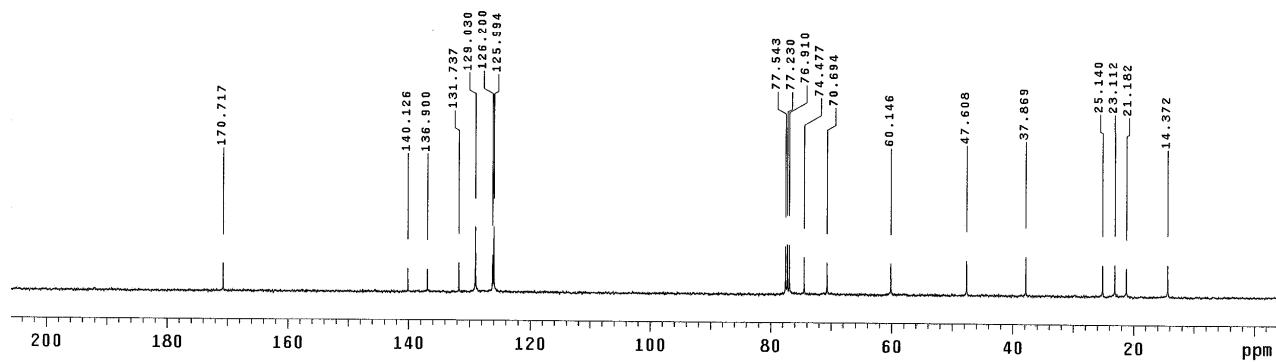

### <sup>1</sup>H NMR spectra of 3c

PS\_580\_M

expl s2pu1

| SAMPLE      |                | SPECIAL    |          |
|-------------|----------------|------------|----------|
| date        | Jan 28 2012    | temp       | not used |
| solvent     | CDCl3          | gain       | not used |
| file        | /export/home/~ | spin       | not used |
| ciftemp     | AKS_PS_580~    | hst        | 0.008    |
| M_Pdt_fid   | pw90           |            | 19.700   |
| ACQUISITION |                | alfa       | 20.000   |
| sw          | 6389.8         | FLAGS      |          |
| at          | 1.998          | il         | n        |
| np          | 25528          | in         | n        |
| fb          | not used       | dp         | y        |
| bs          | 8              | hs         | nn       |
| d1          | 1.000          | PROCESSING |          |
| nt          | 200            | lb         | 0.10     |
| ct          | 84             | fn         | 65536    |
| TRANSMITTER |                | DISPLAY    |          |
| tn          | H1             | sp         | -206.9   |
| sfrq        | 399.853        | wp         | 3576.8   |
| tof         | 362.8          | rfl        | 794.7    |
| tpwr        | 57             | rfp        | 0        |
| pw          | 9.850          | rp         | 100.7    |
| DECOUPLER   |                | lp         | -87.0    |
| dn          | C13            | PLOT       |          |
| dof         | 0              | wc         | 250      |
| dm          | nnn            | sc         | 0        |
| dmm         | c              | vs         | 25       |
| dpwr        | 50             | th         | 20       |
| dmf         | 15900          | nm         | cdc ph   |

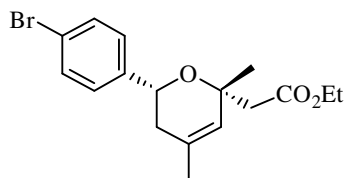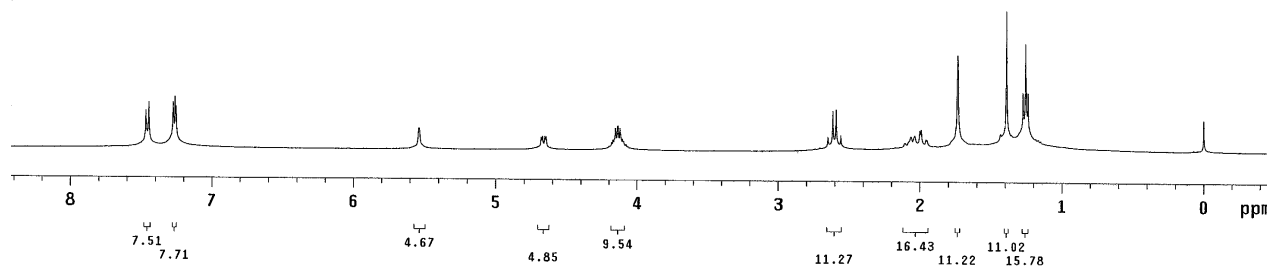

$^{13}\text{C}$  NMR spectra of **3c**

PS\_580\_M  
exp1 s2pu1

| SAMPLE      |                | SPECIAL    |          |
|-------------|----------------|------------|----------|
| date        | Jan 28 2012    | temp       | not used |
| solvent     | CDCl3          | gain       | not used |
| file        | /export/home/~ | spin       | not used |
| ciftemp     | AKS_PS_580~    | hst        | 0.008    |
|             | M_C13.fid      | pw90       | 18.000   |
|             | alfa           |            | 20.000   |
| ACQUISITION |                | FLAGS      |          |
| sw          | 25125.6        |            |          |
| at          | 1.199          | il         | n        |
| np          | 60270          | in         | n        |
| fb          | 13800          | dp         | y        |
| bs          | 16             | hs         | nn       |
| d1          | 1.000          | PROCESSING |          |
| nt          | 5000           | lb         | 2.00     |
| ct          | 2832           | fn         | 65536    |
| TRANSMITTER |                | DISPLAY    |          |
| tn          | C13            | sp         | -426.0   |
| sfrq        | 100.554        | wp         | 21130.6  |
| tof         | 1536.3         | rfl        | 9279.8   |
| tpwr        | 61             | rfp        | 7764.9   |
| pw          | 9.300          | rp         | -49.3    |
|             | DECOUPLER      | lp         | -360.6   |
|             |                | PLOT       |          |
| dn          | H1             |            |          |
| dof         | 0              | wc         | 250      |
| dm          | yyv            | sc         | 0        |
| dmm         | w              | vs         | 20       |
| dpwr        | 42             | th         | 3        |
| dmf         | 8900           | nm         | no ph    |

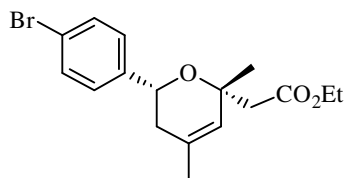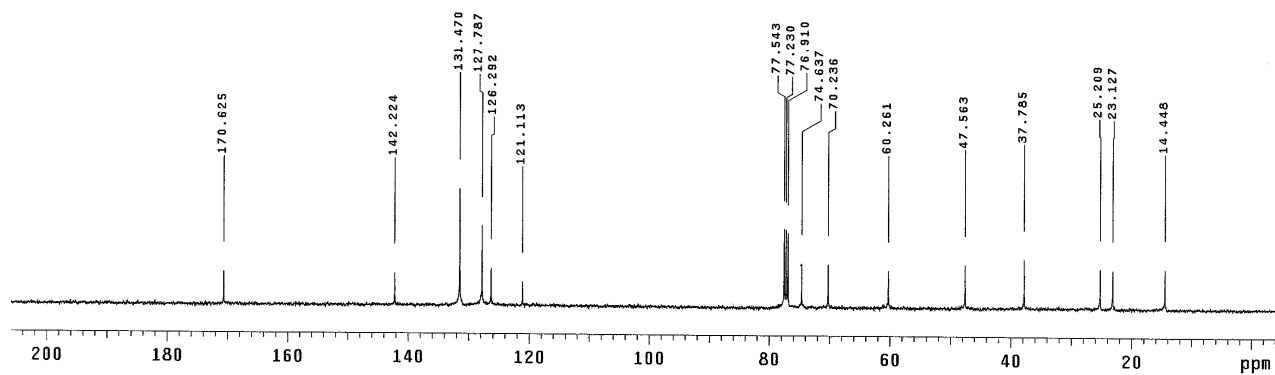

### <sup>1</sup>H NMR spectra of 3d

PS\_571\_M

exp1 s2pu1

| SAMPLE      |                | SPECIAL    |          |
|-------------|----------------|------------|----------|
| date        | Mar 18 2012    | temp       | not used |
| solvent     | CDCl3          | gain       | not used |
| file        | /export/home/~ | spin       | not used |
| ciftemp     | AKS_PS_571~    | hst        | 0.008    |
|             | Hi_Pdt.fid     | pw90       | 19.700   |
|             |                | alfa       | 20.000   |
| ACQUISITION |                | FLAGS      |          |
| sw          | 6389.8         |            |          |
| at          | 1.998          | fl         | n        |
| np          | 25528          | in         | n        |
| fb          | not used       | dp         | y        |
| bs          | 8              | hs         | nn       |
| d1          | 1.000          | PROCESSING |          |
| nt          | 200            | lb         | 0.10     |
| ct          | 200            | fn         | 65536    |
| TRANSMITTER |                | DISPLAY    |          |
| tn          | H1             | sp         | -199.5   |
| efrq        | 399.853        | wp         | 3644.1   |
| tof         | 362.8          | rfl        | 795.6    |
| tpwr        | 57             | rfp        | 0        |
| pw          | 9.850          | rp         | 96.3     |
| DECOUPLER   |                | PLOT       |          |
| dn          | C13            |            |          |
| dof         | 0              | wc         | 250      |
| dm          | nnn            | sc         | 0        |
| dmm         | c              | vs         | 31       |
| dpwr        | 50             | th         | 7        |
| dmf         | 15900          | nm         | cdc ph   |

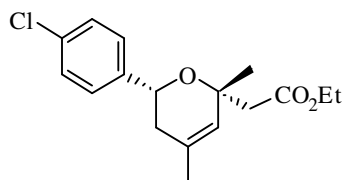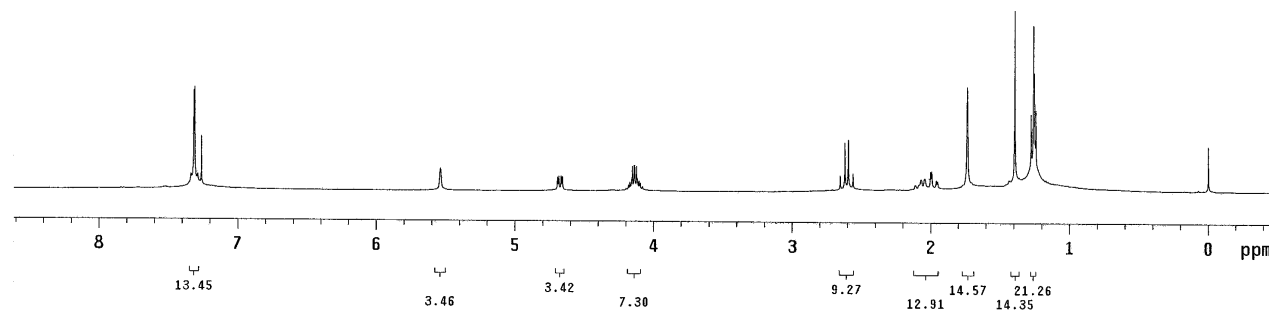

### <sup>13</sup>C NMR spectra of **3d**

PS\_571\_M

expl s2pu1

| SAMPLE      |                   | SPECIAL    |          |
|-------------|-------------------|------------|----------|
| date        | Jan 3 2012        | temp       | not used |
| solvent     | CDCl <sub>3</sub> | gain       | not used |
| file        | /export/home/~    | spin       | not used |
| ciftemp     | AKS_PS_571        | hst        | 0.008    |
|             | M_C13.fid         | pw90       | 18.600   |
|             |                   | alfa       | 20.000   |
| ACQUISITION |                   | FLAGS      |          |
| sw          | 25125.6           |            |          |
| at          | 1.199             | il         | n        |
| np          | 60270             | in         | n        |
| fb          | 13800             | dp         | y        |
| bs          | 16                | hs         | nn       |
| dl          | 1.000             | PROCESSING |          |
| nt          | 2000              | lb         | 2.00     |
| ct          | 1056              | fn         | 65536    |
| TRANSMITTER |                   | DISPLAY    |          |
| tn          | C13               | sp         | -358.5   |
| sfrq        | 100.554           | wp         | 21130.6  |
| tof         | 1536.3            | rfl        | 9279.0   |
| tpwr        | 61                | rfp        | 7764.9   |
| pw          | 9.300             | rp         | -47.1    |
|             |                   | lp         | -376.1   |
| DECOUPLER   |                   | PLOT       |          |
| dn          | H1                |            |          |
| dof         | 0                 | wc         | 250      |
| dm          | yyv               | sc         | 0        |
| dmm         | w                 | vs         | 13       |
| dpwr        | 42                | th         | 3        |
| dmf         | 8900              | nm         | no ph    |

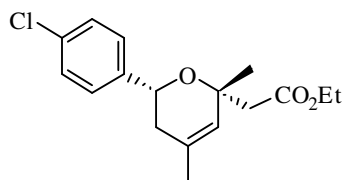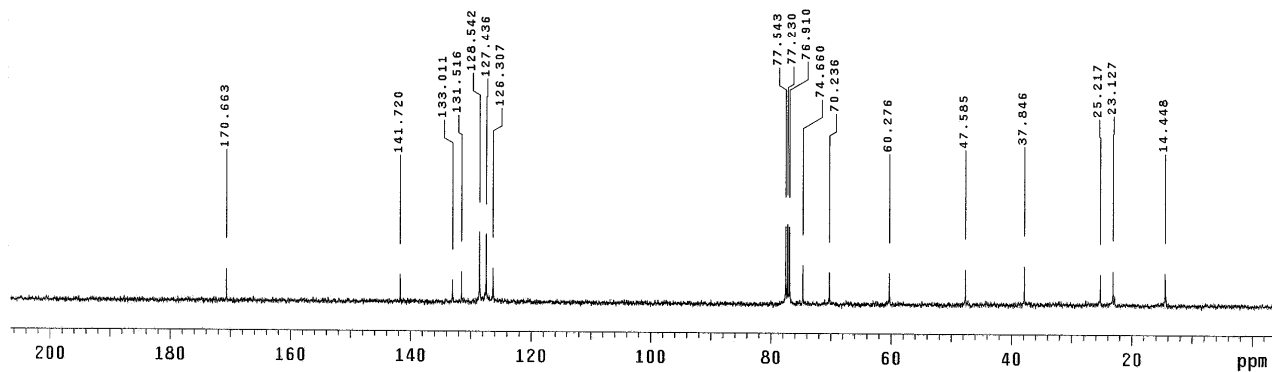

### <sup>1</sup>H NMR spectra of 3e

PS\_609\_M

exp1 s2pu1

|             |             |            |          |
|-------------|-------------|------------|----------|
| date        | Mar 29 2012 | temp       | not used |
| solvent     | CDCl3       | gain       | not used |
| file        | exp         | spin       | not used |
| ACQUISITION |             |            |          |
| sw          | 6389.8      | hst        | 0.008    |
| at          | 1.995       | pw90       | 19.700   |
| np          | 25528       | atfa       | 20.000   |
| fb          | not used    | il         | n        |
| bs          | 8           | in         | n        |
| d1          | 1.000       | dp         | y        |
| nt          | 200         | hs         | nn       |
| ct          | 112         | PROCESSING |          |
| tn          | H1          | lb         | 0.10     |
| sfrq        | 399.853     | fn         | 65536    |
| tof         | 362.8       | sp         | -198.3   |
| tpwr        | 57          | wp         | 3602.0   |
| pw          | 9.850       | rfl        | 794.5    |
| DECOUPLER   |             |            |          |
| dn          | C13         | rp         | 91.8     |
| dof         | 0           | lp         | -87.5    |
| dm          | nnn         | PLOT       |          |
| dmm         | c           | wc         | 250      |
| dpwr        | 50          | sc         | 0        |
| dmf         | 15900       | vs         | 34       |
|             |             | th         | 3        |
|             |             | nm         | cdc ph   |

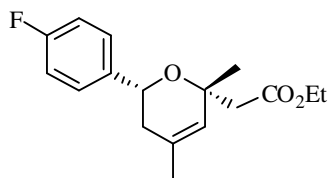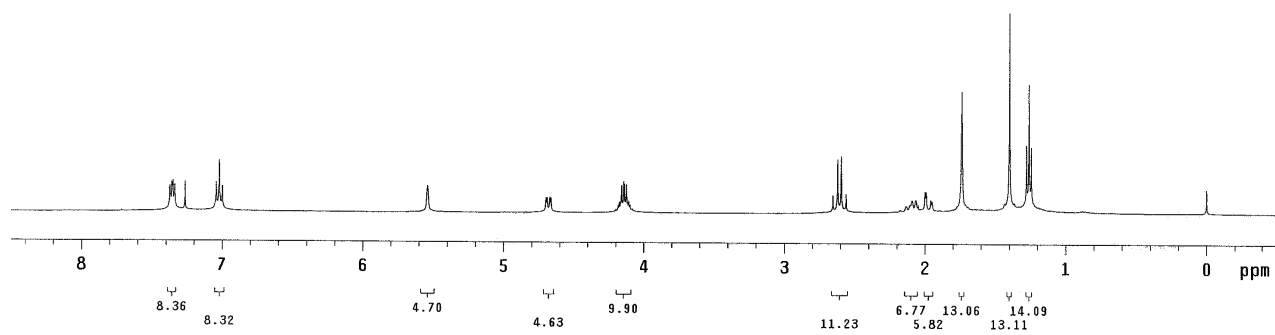

### $^{13}\text{C}$ NMR spectra of **3e**

PS\_609\_M

exp1 s2pu1

| SAMPLE      |                   | SPECIAL    |          |       |
|-------------|-------------------|------------|----------|-------|
| date        | Mar 29 2012       | temp       | not used |       |
| solvent     | CDCl <sub>3</sub> | gain       | not used |       |
| file        |                   | sp1n       | not used |       |
| ACQUISITION |                   |            |          |       |
| sw          | 25125.6           | hst        | 0.008    |       |
| at          | 1.199             | alfa       | 20.000   |       |
| np          | 60270             | FLAGS      |          |       |
| fb          | 13800             | il         | n        |       |
| bs          | 16                | in         | n        |       |
| d1          | 1.000             | dp         | y        |       |
| nt          | 10000             | hs         | nn       |       |
| ct          | 8736              | PROCESSING |          |       |
| TRANSMITTER |                   | lb         | 2.00     |       |
| tn          | C13               | fn         | 65536    |       |
|             |                   | DISPLAY    |          |       |
| sfrq        | 100.554           | sp         | -781.0   |       |
| tof         | 1536.3            | wp         | 21922.7  |       |
| tpwr        | 61                | rfl        | 9272.1   |       |
| pw          | 9.300             | rfp        | 7764.9   |       |
| DECOUPLER   |                   | H1         | rp       | -48.2 |
| dn          | 0                 | lp         | -360.4   |       |
| dm          |                   | PLOT       |          |       |
| dmm         | w                 | wc         | 250      |       |
| dpwr        | 42                | sc         | 0        |       |
| dmf         | 8900              | vs         | 45       |       |
|             |                   | th         | 2        |       |
|             |                   | nm         | no       |       |
|             |                   | ph         |          |       |

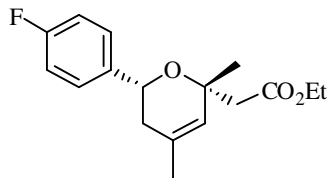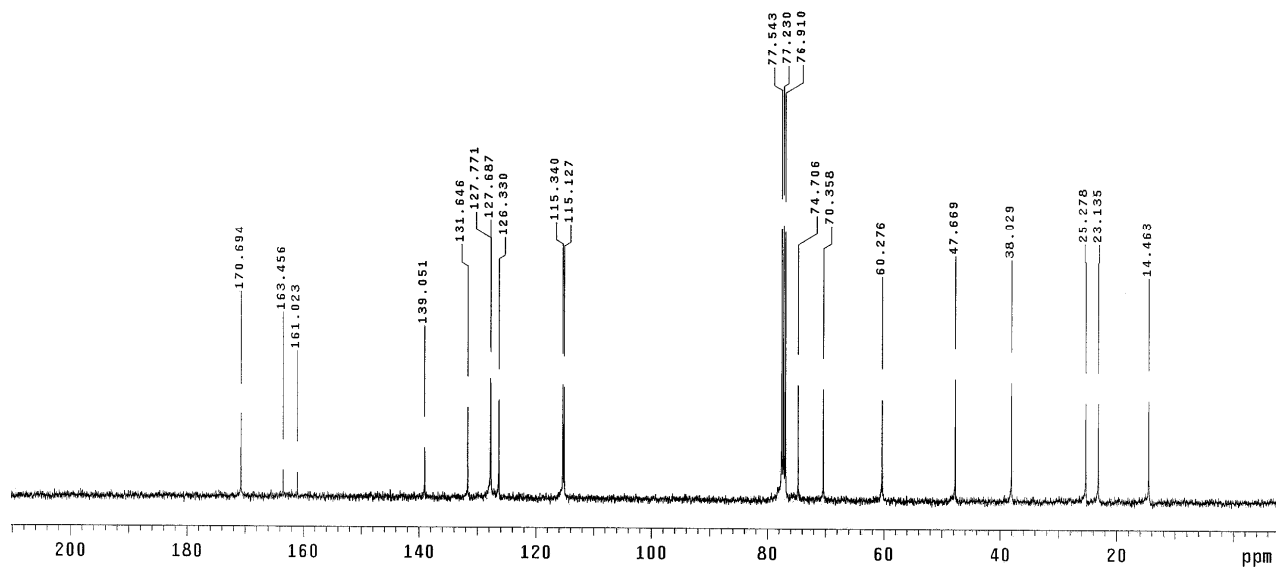

### $^{19}\text{F}$ NMR spectra of **3e**

PS\_609\_M

exp1 s2pu1

| SAMPLE      |             | SPECIAL    |          |
|-------------|-------------|------------|----------|
| date        | Mar 29 2012 | temp       | not used |
| solvent     | CDCl3       | gain       | not used |
| file        |             | exp        | not used |
| ACQUISITION |             | hst        | 0.008    |
| sw          | 100000.0    | pw90       | 15.600   |
| at          | 0.600       | alfA       | 90.000   |
| np          | 119936      | FLAGS      |          |
| fb          | 55000       | il         | n        |
| bs          | 16          | in         | n        |
| d1          | 1.500       | dp         | y        |
| nt          | 64          | hs         | nn       |
| ct          | 64          | PROCESSING |          |
| TRANSMITTER |             | lb         | 0.30     |
| tn          | F19         | lsfid      | -10      |
| sfrq        | 376.236     | fn         | not used |
| tof         | 40099.4     | DISPLAY    |          |
| tpwr        | 58          | sp         | -88487.1 |
| pw          | 5.200       | wp         | 98291.0  |
| DECOUPLER   |             | rfl        | 89012.0  |
| dn          | H1          | rtp        | 0        |
| dof         | 0           | rp         | -132.1   |
| dm          |             | nnn        | 18.0     |
| dmm         | c           | PLOT       |          |
| dpwr        | 42          | wc         | 250      |
| dmf         | 8900        | sc         | 0        |
|             |             | vs         | 15       |
|             |             | th         | 8        |
|             |             | ai         | no ph    |

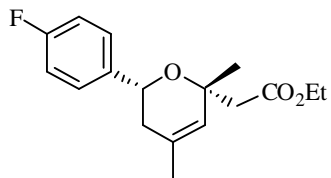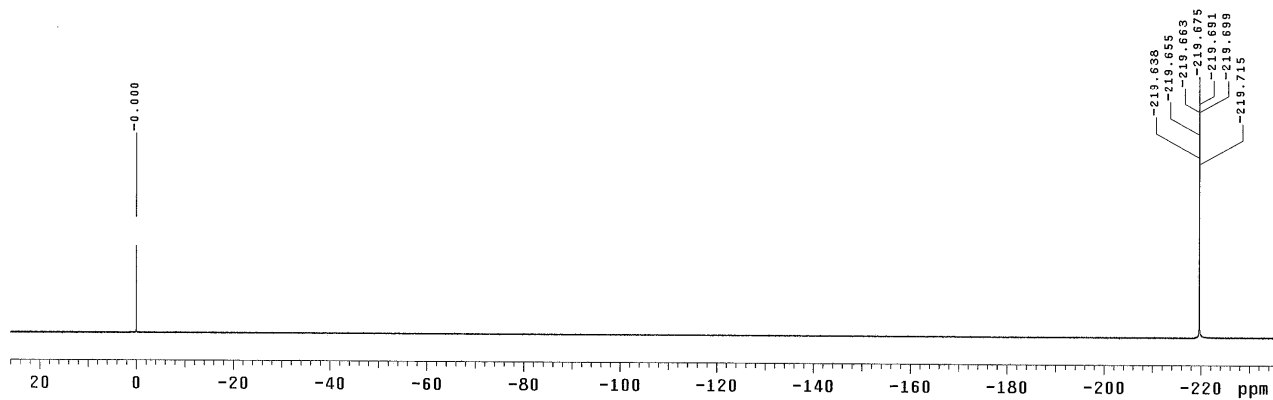



### <sup>1</sup>H NMR spectra of **3f**

PS\_585\_M

exp1 s2pu1

| SAMPLE              |                | SPECIAL    |          |
|---------------------|----------------|------------|----------|
| date                | Feb 5 2012     | temp       | not used |
| solvent             | CDCl3          | gain       | not used |
| file                | /export/home/~ | spin       | not used |
| ciftemp/AKS_PS_585~ |                | hst        | 0.008    |
|                     |                | M.fid      | pw90     |
|                     |                | alfa       | 20.000   |
| ACQUISITION         |                | FLAGS      |          |
| sw                  | 6389.8         |            |          |
| at                  | 1.998          | il         | n        |
| np                  | 25528          | in         | n        |
| fb                  | not used       | dp         | y        |
| bs                  | 8              | hs         | nn       |
| d1                  | 1.000          | PROCESSING |          |
| nt                  | 200            | lb         | 0.10     |
| ct                  | 136            | fn         | 65536    |
| TRANSMITTER         |                | DISPLAY    |          |
| tn                  | H1             | sp         | -189.0   |
| sfrq                | 399.853        | wp         | 3677.6   |
| tof                 | 362.8          | rfl        | 793.5    |
| tpwr                | 57             | rfp        | 0        |
| pw                  | 9.850          | rp         | 109.5    |
| DECOUPLER           |                | PLOT       |          |
| dn                  | C13            | lp         | -100.6   |
| dof                 | 0              | wc         | 250      |
| dm                  | nnn            | sc         | 0        |
| dmm                 | c              | vs         | 22       |
| dpr                 | 50             | th         | 4        |
| dmf                 | 15900          | nm         | cdc ph   |

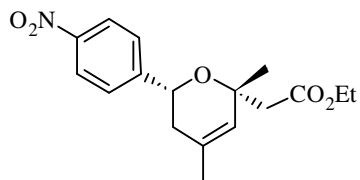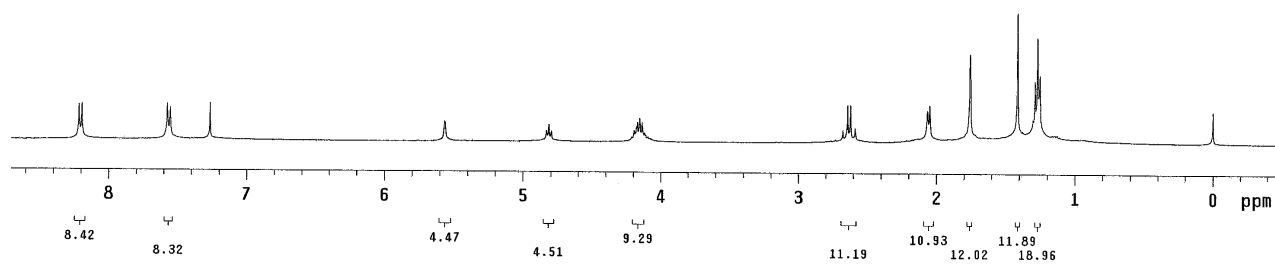

### $^{13}\text{C}$ NMR spectra of **3f**

PS\_585\_M

exp1 s2pu1

|             |                   |            |          |
|-------------|-------------------|------------|----------|
| SAMPLE      |                   | SPECIAL    |          |
| date        | Feb 5 2012        | temp       | not used |
| solvent     | CDCl <sub>3</sub> | gain       | not used |
| file        | /export/home/~    | spin       | not used |
| clftemp     | AKS_PS_585~       | hst        | 0.008    |
| ACQUISITION |                   | pw90       | 18.600   |
|             |                   | alfa       | 20.000   |
| sw          | 25125.6           | FLAGS      |          |
| at          | 1.199             | il         | n        |
| np          | 60270             | in         | n        |
| fb          | 13800             | dp         | y        |
| bs          | 16                | hs         | nn       |
| d1          | 1.000             | PROCESSING |          |
| nt          | 5000              | lb         | 2.00     |
| ct          | 1424              | fn         | 65536    |
| TRANSMITTER |                   | DISPLAY    |          |
| tn          | C13               | sp         | -590.1   |
| sfrq        | 100.554           | wp         | 21625.2  |
| tof         | 1536.3            | rfl        | 9279.0   |
| tpwr        | 61                | rffp       | 7764.9   |
| DECOUPLER   |                   | rp         | -42.0    |
|             |                   | lp         | -363.4   |
| dn          | H1                | PLOT       |          |
| dof         | 0                 | wc         | 250      |
| dm          | yvy               | sc         | 0        |
| dmm         | w                 | vs         | 14       |
| dpwr        | 42                | th         | 3        |
| dmf         | 8900              | nm         | no ph    |

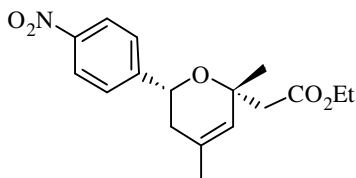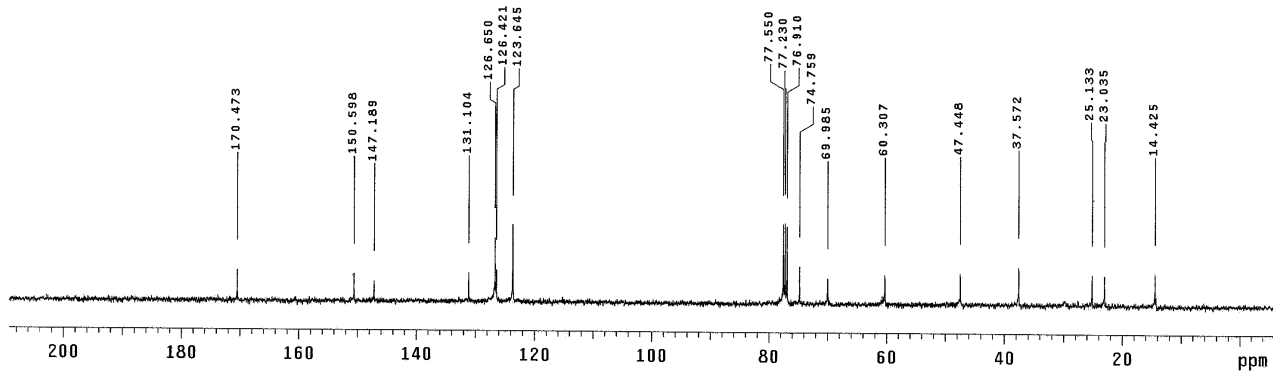

### <sup>1</sup>H NMR spectra of **3g**

PS\_574\_M

exp1 s2pu1

```
SAMPLE          SPECIAL
date Jan 15 2012 temp not used
solvent CDCl3 gain not used
file /export/home/~ spin not used
ciftemp/AKS_PS_574~ hst 0.008
M_Pdt.fid pw90 19.700
ACQUISITION alfa 20.000
sw 6389.8 FLAGS
at 1.998 fl n
np 25528 in n
fb not used dp y
bs 8 hs nn
d1 1.000 PROCESSING
nt 200 lb 0.10
ct 200 fn 65536
TRANSMITTER H1 sp DISPLAY
tn H1 sp -196.8
sfrq 399.853 wp 3593.6
tof 362.8 rfl 792.9
tpwr 57 rfp 0
pw 9.850 rp 104.6
DECOUPLER lp -89.4
dn C13 PLOT
dof 0 wc 250
dm nnn sc 0
dmm c vs 22
dpwr 50 th 20
dmf 15900 nm cdc ph
```

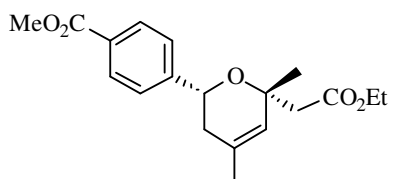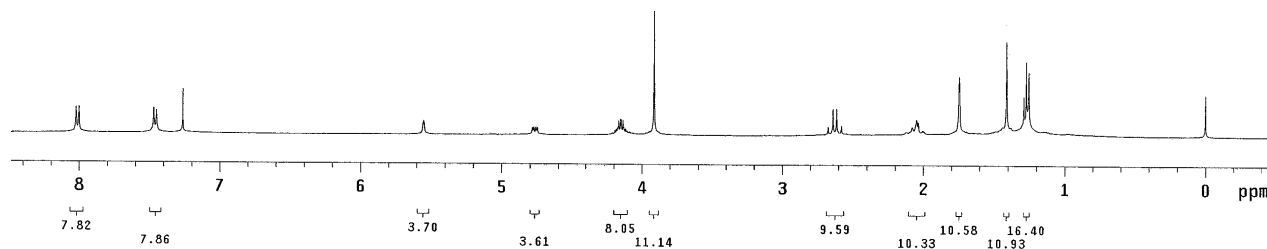

### <sup>13</sup>C NMR spectra of **3g**

PS\_574\_M

exp1 s2pu1

```
SAMPLE          SPECIAL
date   Jan 10 2012  temp   not used
solvent CDCl3      gain   not used
file   /export/home/~ spin  not used
ciftemp/AKS_PS_574- hst   0.008
M_pdt_C13_fid      pu90   18.500
ACQUISITION      alfa     20.000
sw       25125.6      FLAGS
at       1.199      il     n
np       60270      in     n
fb       13800      dp     y
bs       16        hs     nn
dl       1.000      PROCESSING
nt       2000      lb     2.00
ct       1264      fn     65536
TRANSMITTER      C13      sp     -557.1
sfrq     100.554     wp     21262.5
tof      1536.3     rfl     9279.0
tpwr     61        rfp     7764.9
pw       9.300     rp     -46.6
DECOUPLER      H1        lp     -381.5
dn       0         wc     250
dof      0         YVY    sc     0
dm       12        w      vs     17
dpmr     42        th     nm     3
dmf      8900      no     ph
```

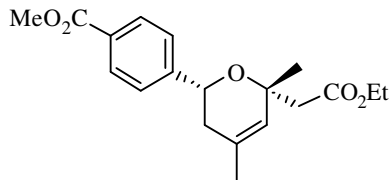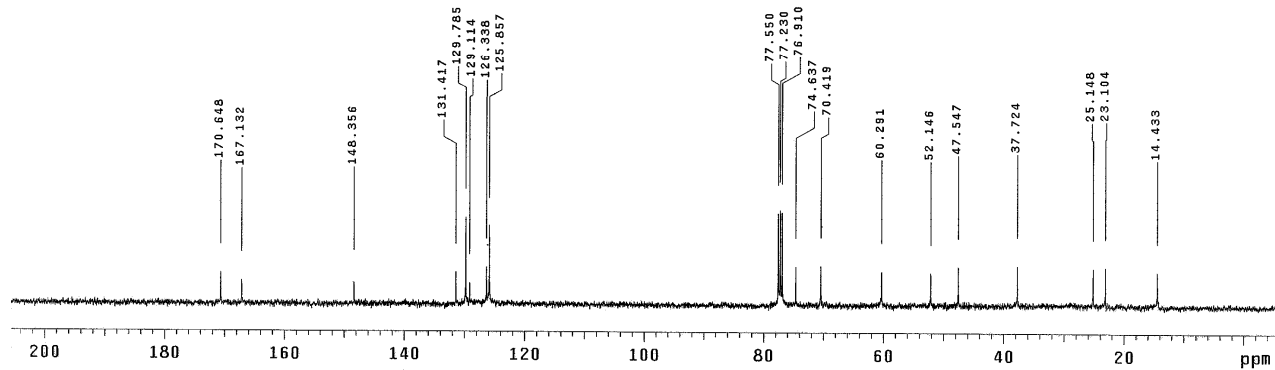

### <sup>1</sup>H NMR spectra of **3h**

PS\_575\_M

exp1 s2pu1

```
SAMPLE          SPECIAL
date   Jan 12 2012  temp   not used
solvent CDC13      gain   not used
file   /export/home/~ spin  not used
ciftemp/AKS_PS_575~ hst   0.008
M_Pdt.fid pw30     19.700
ACQUISITION a1fa   20.000
sw      6389.8      FLAGS
at      1.998      i1    n
np      25528      in    n
fb      not used   dp    y
bs      8          hs    nn
d1      1.000      PROCESSING
nt      100       lb     0.10
ct      100       fn     65536
TRANSMITTER      DISPLAY
tn      H1       sp     -254.5
cfrq    399.853  wp     3660.9
tof     362.8    rf1    791.7
tpwr    57      rfp    0
pw      9.850    rp     96.2
DECOUPLER C13     lp     -63.9
dn      0       wc     250
dof     0       nnn    sc    0
dm      0       c     vs    32
dpmr    50     th    nm    10
dmf     15900   nm    cdc   ph
```

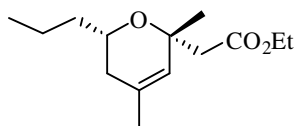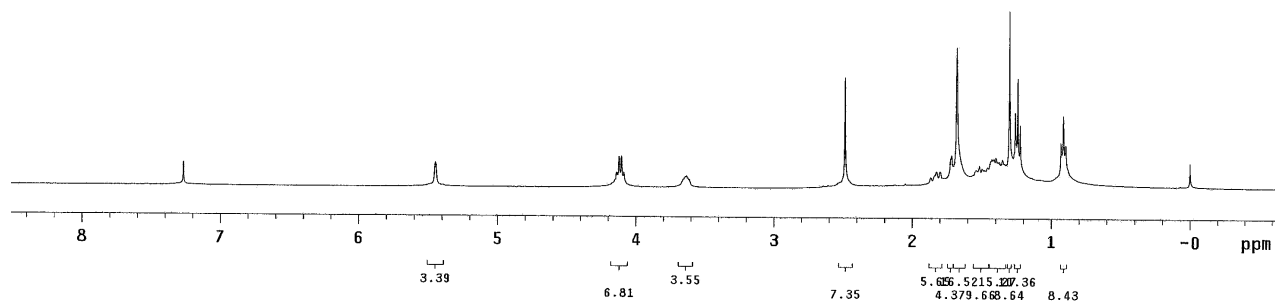

### <sup>13</sup>C NMR spectra of **3h**

PS\_575\_M

exp1 s2pu1

| SAMPLE      |                | SPECIAL    |          |
|-------------|----------------|------------|----------|
| date        | Jan 12 2012    | temp       | not used |
| solvent     | CDCl3          | gain       | not used |
| file        | /export/home/~ | spin       | not used |
| ciftemp     | AKS_PS_575~    | hst        | 0.008    |
|             | M_C13.fid      | pw90       | 18.600   |
|             | alfa           |            | 20.000   |
| ACQUISITION |                | FLAGS      |          |
| sw          | 25125.6        |            | n        |
| at          | 1.139          | il         | n        |
| np          | 60270          | in         | n        |
| fb          | 13800          | dp         | y        |
| bs          | 16             | hs         | nn       |
| d1          | 1.000          | PROCESSING |          |
| nt          | 2000           | lb         | 2.00     |
| ct          | 544            | fn         | 65536    |
| TRANSMITTER |                | DISPLAY    |          |
| tn          | C13            | sp         | -1511.0  |
| sfrq        | 100.554        | wp         | 25125.6  |
| tof         | 1536.3         | rfl        | 9275.9   |
| tpwr        | 61             | rfp        | 7764.9   |
| pw          | 9.300          | rp         | -92.8    |
| DECOUPLER   |                | PLOT       |          |
| dn          | H1             | lp         | -271.4   |
| dof         | 0              | wc         | 250      |
| dm          | yyv            | sc         | 0        |
| dmm         | w              | vs         | 7        |
| dpwr        | 42             | th         | 2        |
| dmf         | 8900           | nm         | no ph    |

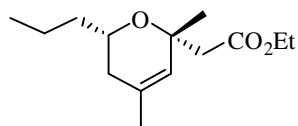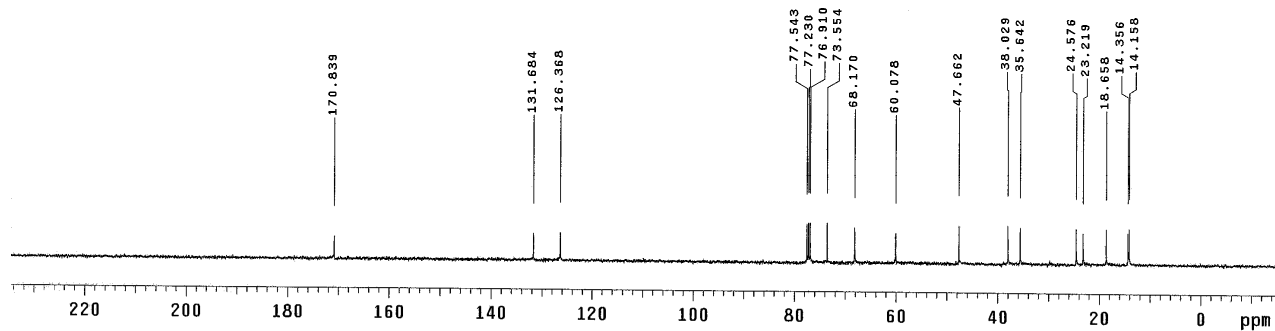

### $^1\text{H}$ NMR spectra of **3i**

PS\_581\_M

exp1 s2pu1

```
SAMPLE SPECIAL
date Jan 31 2012 temp not used
solvent CDCl3 gain not used
file /export/home/~ spin not used
ciftemp/AKS_PS_581~ hst 0.008
M.fid pw90 19.700
ACQUISITION alfa 20.000
sw 6389.8
at 1.998 f1 n
np 25528 in n
fb not used dp y
bs 8 hs nn
di 1.000
nt 200 lb 0.10
ct 200 fn 65536
TRANSMITTER H1 sp -197.7
sfrq 399.853 wp 3560.0
tof 362.8 rfl 793.9
tpwr 57 rfp 0
pw 9.850 rp 112.8
DECOUPLER C13 lp -94.0
dn dof 0 wc 250
dm dmm nnn sc 0
dmm c vs 40
dpwr 50 th 20
dmf 15900 nm cdc ph
```

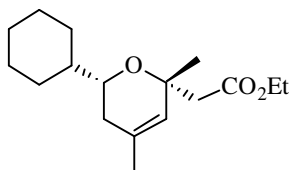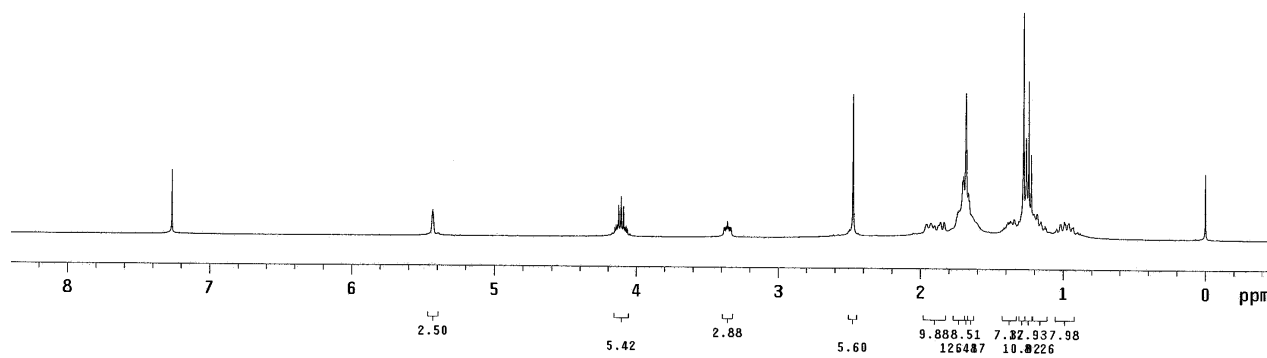

### $^{13}\text{C}$ NMR spectra of **3i**

PS\_581\_M

expl s2pu1

| SAMPLE      |                   | SPECIAL    |          |
|-------------|-------------------|------------|----------|
| date        | Jan 31 2012       | temp       | not used |
| solvent     | CDCl <sub>3</sub> | gain       | not used |
| file        | /export/home/~    | spin       | not used |
| ciftemp     | AKS_PS_581~       | hst        | 0.008    |
| M_C13.fid   |                   | pw90       | 18.000   |
| ACQUISITION | alfa              |            | 20.000   |
| sw          | 25125.6           | FLAGS      |          |
| at          | 1.199             | il         | n        |
| np          | 60270             | in         | n        |
| fb          | 13800             | dp         | y        |
| bs          | 16                | hs         | nn       |
| d1          | 1.000             | PROCESSING |          |
| nt          | 4000              | lb         | 2.00     |
| ct          | 992               | fn         | 65536    |
| TRANSMITTER | C13               | sp         | -520.3   |
| sfrq        | 100.554           | wp         | 21196.6  |
| tof         | 1536.3            | rfl        | 9275.2   |
| tpwr        | 61                | rfp        | 7764.9   |
| pw          | 9.300             | rp         | -71.0    |
| DECOUPLER   | H1                | lp         | -322.6   |
| dn          | 0                 | PLOT       |          |
| dof         | 0                 | wc         | 250      |
| dm          | yyv               | sc         | 0        |
| dmm         | w                 | vs         | 12       |
| dpwr        | 42                | th         | 3        |
| dmf         | 8900              | nm         | no ph    |

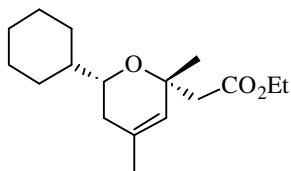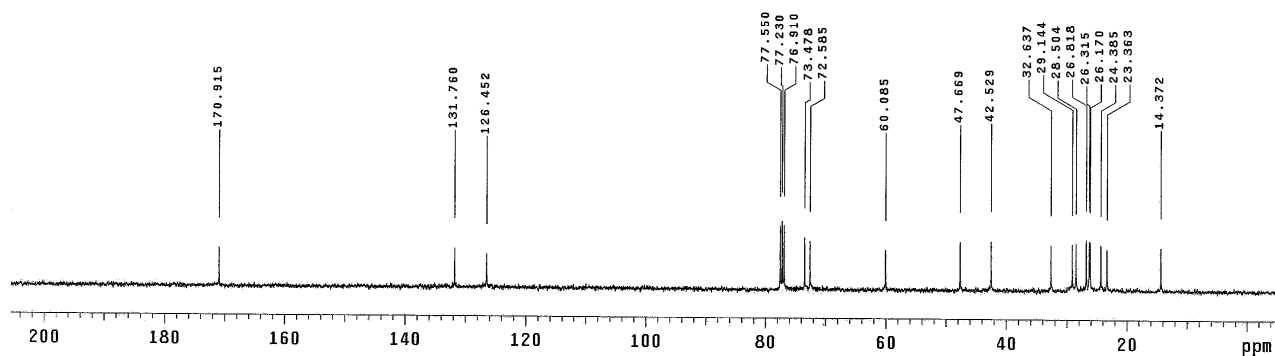



### $^1\text{H}$ NMR spectra of **3j**

PS\_587\_M

exp1 s2pu1

| SAMPLE             |                | SPECIAL    |          |
|--------------------|----------------|------------|----------|
| date               | Feb 8 2012     | temp       | not used |
| solvent            | CDCl3          | gain       | not used |
| file               | /export/home/~ | spin       | not used |
| ciftemp/AKS_PS_587 |                | hst        | 0.008    |
|                    | M.fid          | pw90       | 19.700   |
|                    | alfa           |            | 20.000   |
| ACQUISITION        |                | FLAGS      |          |
| sw                 | 6389.8         |            |          |
| at                 | 1.998          | fl         | n        |
| np                 | 25528          | in         | n        |
| fb                 | not used       | dp         | y        |
| bs                 | 8              | hs         | nn       |
| d1                 | 1.000          | PROCESSING |          |
| nt                 | 200            | lb         | 0.10     |
| ct                 | 200            | fn         | 65536    |
| TRANSMITTER        |                | DISPLAY    |          |
| tn                 | H1             | sp         | -164.0   |
| sfrq               | 399.853        | wp         | 3568.4   |
| cof                | 362.8          | rfl        | 793.7    |
| tpwr               | 57             | rfp        | 0        |
| pw                 | 9.850          | rp         | 110.6    |
| DECOUPLER          |                | PLOT       |          |
| dn                 | C13            | lp         | -90.4    |
| dof                | 0              | wc         | 250      |
| dm                 | nnn            | sc         | 0        |
| dmm                | c              | vs         | 27       |
| dpwr               | 50             | th         | 9        |
| dmf                | 15900          | nm         | cdc ph   |

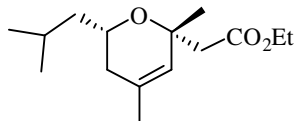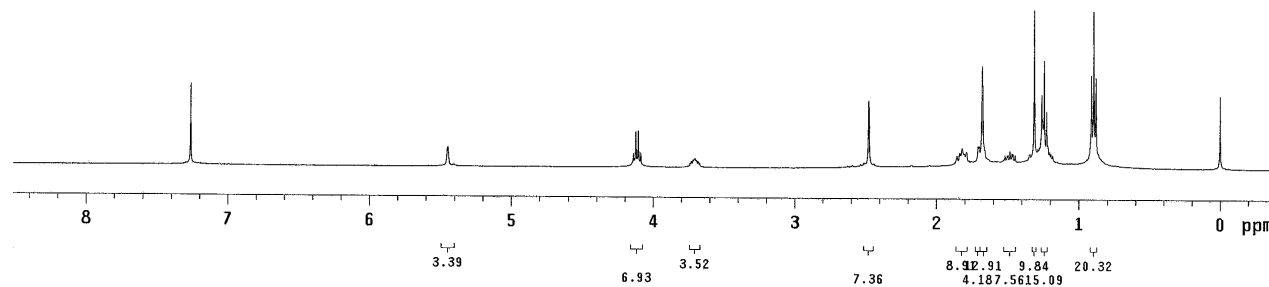

### $^{13}\text{C}$ NMR spectra of **3j**

PS\_587\_M

exp1 s2pu1

```
SAMPLE          SPECIAL
date   Feb  8 2012  temp   not used
solvent CDC13      gain   not used
file   /export/home/~ spin  not used
ciftemp/AKS_PS_587~ hst   0.008
M_C13.fid pu90     18.600
ACQUISITION     alfa    20.000
sw      25125.6      FLAGS
at      1.199       il   n
np      60270       in   n
fb      13800       dp   y
us      16         hs   nn
d1      1.000
nt      4000       lb   2.00
ct      992       fn   65536
TRANSMITTER     DISPLAY
tn      C13       sp   -649.2
sfrq    100.554   wp   21493.3
tof     1536.3   rfl  9272.1
tpwr    61      rfp  7764.9
pw      9.300   rp   -88.6
DECOUPLER       lp   -271.4
dn      H1      PLOT
dof     0       wc   250
dm      yyy    sc   0
dmm     w     vs   16
dpwr    42    th   4
dmf     8900  nm   no ph
```

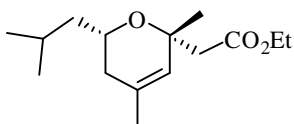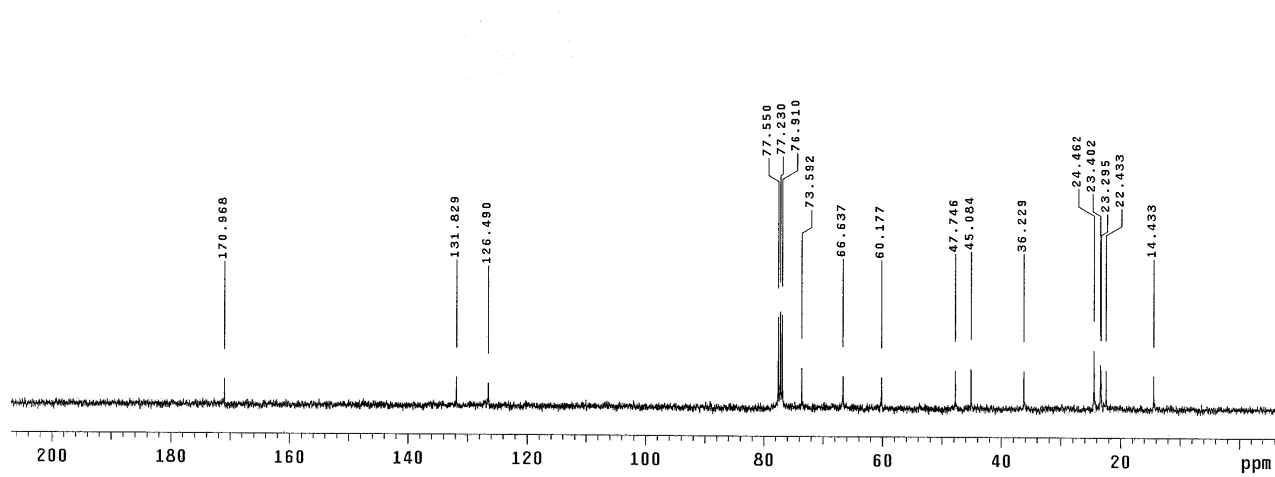

### <sup>1</sup>H NMR spectra of 3k

PS\_582\_M

exp1 s2pu1

| SAMPLE              |                | SPECIAL    |          |
|---------------------|----------------|------------|----------|
| date                | Feb 1 2012     | temp       | not used |
| solvent             | CDCl3          | gain       | not used |
| file                | /export/home/~ | spin       | not used |
| ciftemp/AKS_PS_582~ | hst            |            | 0.008    |
|                     | _M_fid         | pw90       | 19.700   |
| ACQUISITION         | alfa           |            | 20.000   |
| sw                  | 6389.8         | FLAGS      |          |
| at                  | 1.998          | il         | n        |
| np                  | 25528          | in         | n        |
| fb                  | not used       | dp         | y        |
| bs                  | 8              | hs         | nn       |
| d1                  | 1.000          | PROCESSING |          |
| nt                  | 200            | lb         | 0.10     |
| ct                  | 200            | fn         | 65536    |
| TRANSMITTER         | H1             | sp         | -173.6   |
| sfrq                | 399.853        | wp         | 3551.7   |
| tof                 | 362.8          | rfl        | 794.8    |
| tpwr                | 57             | rfp        | 0        |
| pw                  | 9.850          | rp         | 107.6    |
| DECOUPLER           | C13            | lp         | -91.2    |
| dn                  | 0              | PLOT       |          |
| dof                 | 0              | wc         | 250      |
| dm                  | nnn            | sc         | 0        |
| dmm                 | c              | vs         | 19       |
| dpwr                | 50             | th         | 7        |
| dmf                 | 15900          | nm         | cdc ph   |

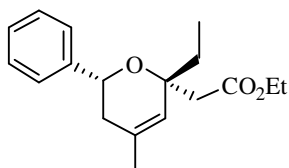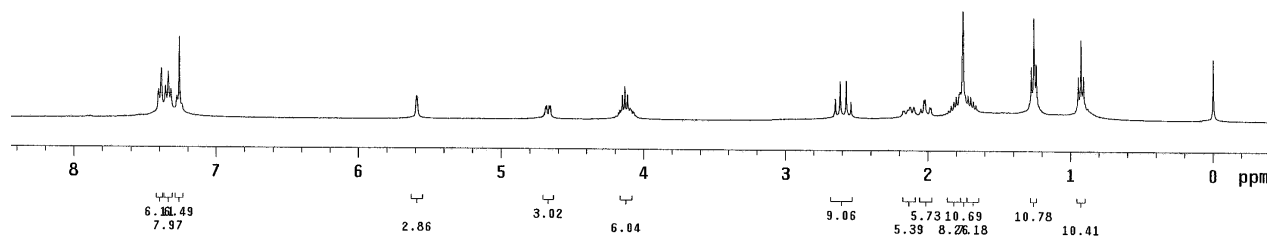

### $^{13}\text{C}$ NMR spectra of **3k**

PS\_582\_M

exp1 s2pu1

| SAMPLE             |                | SPECIAL    |          |
|--------------------|----------------|------------|----------|
| date               | Feb 1 2012     | temp       | not used |
| solvent            | CDCl3          | gain       | not used |
| file               | /export/home/~ | spin       | not used |
| ciftemp/AKS_PS_582 | hst            |            | 0.008    |
| M_C13.fid          | pw90           |            | 18.600   |
| ACQUISITION        | alfa           |            | 20.000   |
| sw                 | 25125.6        | FLAGS      |          |
| at                 | 1.199          | fl         | n        |
| np                 | 60270          | in         | n        |
| Fb                 | 13800          | dp         | y        |
| bs                 | 16             | hs         | nn       |
| d1                 | 1.000          | PROCESSING |          |
| nt                 | 8000           | lb         | 2.00     |
| ct                 | 3232           | fn         | 65536    |
| TRANSMITTER        | C13            | sp         | -489.7   |
| sfrq               | 100.554        | wp         | 21223.5  |
| tof                | 1536.3         | rfl        | 9277.5   |
| tpwr               | 61             | rfp        | 7764.9   |
| pw                 | 9.300          | rp         | -78.5    |
| DECOUPLER          | H1             | lp         | -293.2   |
| dn                 |                | PLOT       |          |
| dof                | 0              | wc         | 250      |
| dm                 | yyy            | sc         | 0        |
| dmm                | w              | vs         | 19       |
| dpwr               | 42             | th         | 3        |
| dmf                | 8900           | nm         | no ph    |

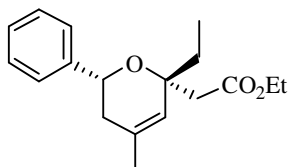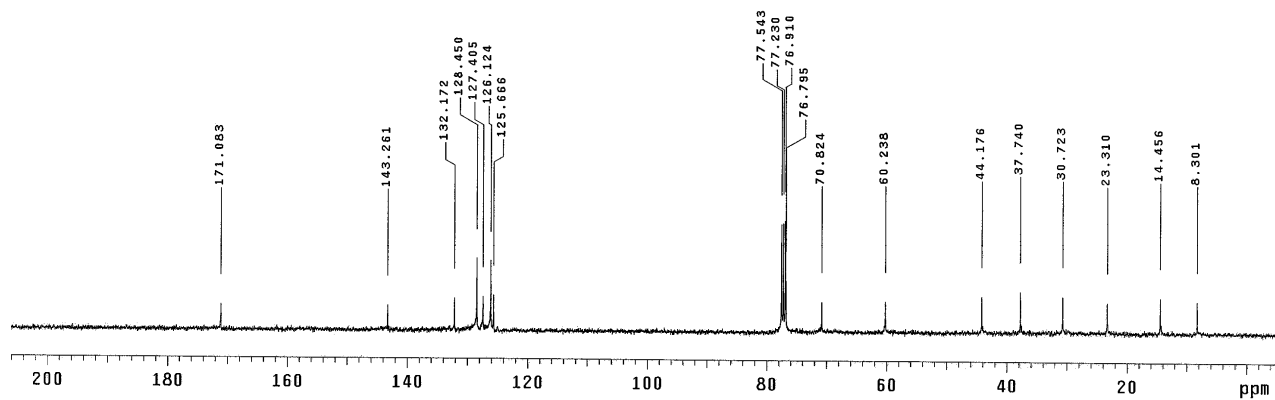

### <sup>1</sup>H NMR spectra of **31**

```
PS_592_M
exp1 s2pu1
SAMPLE
date Feb 19 2012 temp not used
solvent CDCl3 gain not used
file /export/home/~ spin not used
ciftemp/AKS_PS_592~ hst 0.008
M.fid pw90 19.700
ACQUISITION a1fa 20.000
sw 6389.8 FLAGS
at 1.998 f1 n
np 25528 in n
fb not used dp y
bs 8 hs nn
dl 1.000 PROCESSING
nt 200 lb 0.10
ct 200 fn 65536
TRANSMITTER H1 sp -166.0
effq 399.853 wp 3484.6
tof 362.8 rfl 795.6
tpwr 57 rfp 0
pw 9.850 rp 109.2
DECOUPLER C13 lp -97.8
dn 0 wc 250
dof 0 nnn sc 0
dm c vs 23
dpwr 50 th 6
dmf 15900 nm cdc ph
```

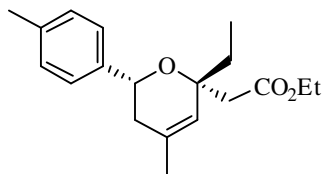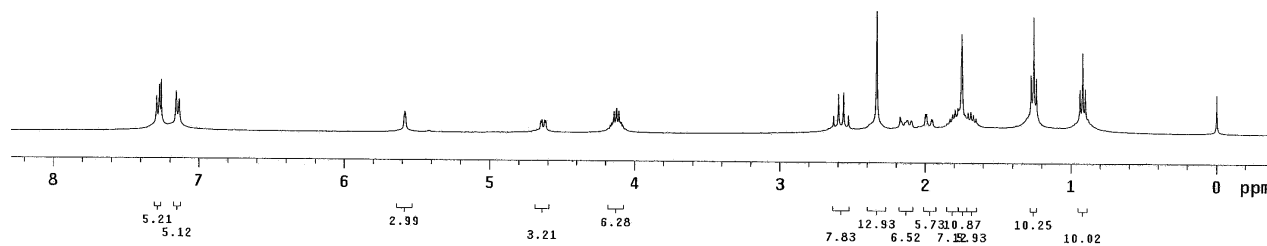

### <sup>13</sup>C NMR spectra of 31

```
PS_592_M
exp1 s2pu1
SAMPLE
date Feb 19 2012 temp not used
solvent CDCl3 gain not used
file /export/home/~ spin not used
ciftemp/AKS_PS_592~ hst 0.008
M_C13.fid pw90 18.600
ACQUISITION alfa 20.000
sw 25125.6
at 1.199 fl
np 60270 in
fb 13800 dp
bs 16 hs
d1 1.000
nt 8000 lb
ct 3200 fn
SPECIAL
PROCESSING
2.00
65536
TRANSMITTER
C13 sp
tn 100.554 wp
sfrq 1536.3 rfl
tof 9275.2
tpwr 61 rfp
pw 9.300 rp
DECOUPLER H1 lp
PLOT
dn 0 wc
doF 0
dm yyy Sc
dmm w vs
dpwr 42 th
dmf 8900 nm no ph
-685.2
21361.4
9275.2
7764.9
-60.3
-349.0
250
0
20
3
```

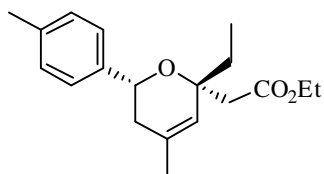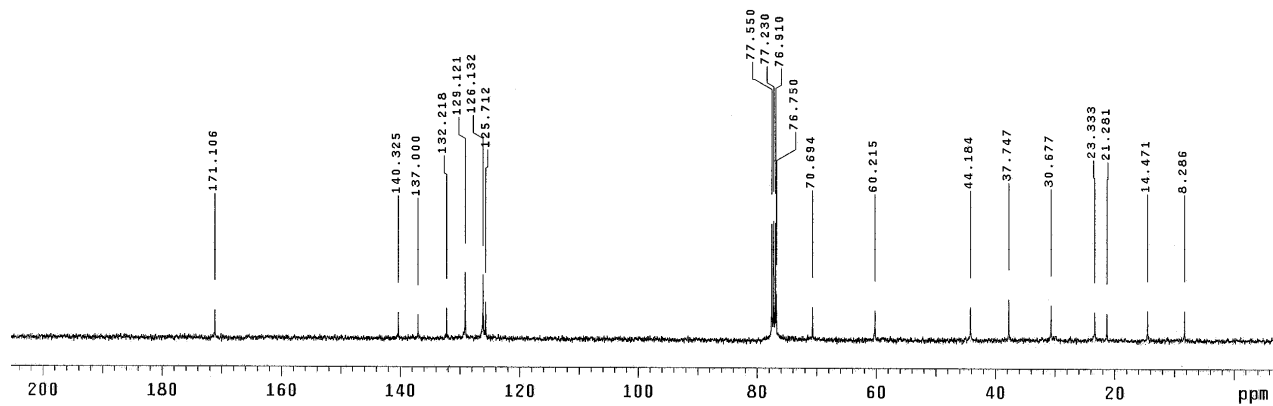

### <sup>1</sup>H NMR spectra of **3m**

PS\_590\_M

exp1 s2pu1

```
SAMPLE          SPECIAL
date    Feb 15 2012  temp    not used
solvent  CDCl3      gain    not used
file     /export/home/~  spin    not used
ciftemp/AKS_PS_590~  hst     0.008
ACQUISITION  M.fid    pw90    19.700
           a1fa     20.000
sw        6389.8      FLAGS
at        1.998      il      n
np        25528      in      n
fb        not used   dp      y
bs        8         hs      nn
di        1.000      PROCESSING
nt        200       lb      0.10
ct        200       fn      65536
TRANSMITTER H1      sp      -248.4
           H1      wp      3618.7
           H1      rf1     794.1
           H1      rfp     0
           H1      rp      98.1
           H1      lp      -71.9
DECOUPLER  C13      PLOT
dn         0        wc      250
dm         nm       sc      0
dmm        c       vs      20
dpwr       50      th      20
dmf        15900   nm      cdc  ph
```

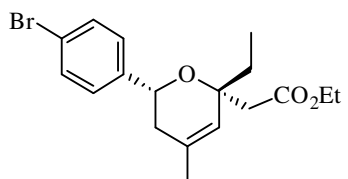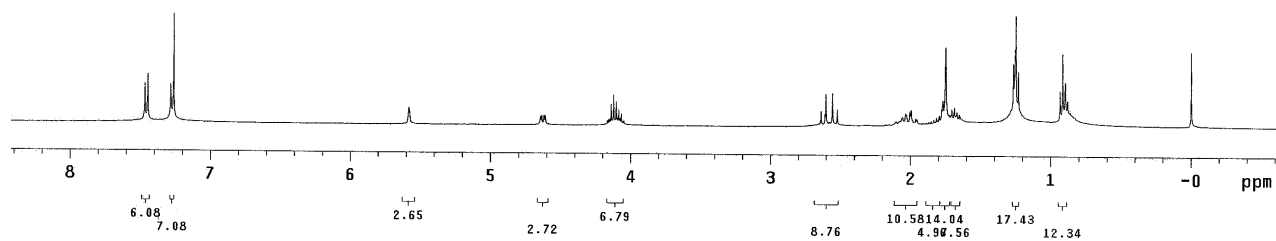

### <sup>13</sup>C NMR spectra of **3m**

PS\_590\_M

exp1 s2pu1

|             |                   |            |          |
|-------------|-------------------|------------|----------|
| SAMPLE      |                   | SPECIAL    |          |
| date        | Feb 14 2012       | temp       | not used |
| solvent     | CDCl <sub>3</sub> | gain       | not used |
| file        | /export/home/~    | spin       | not used |
| ciftemp     | AKS_PS_590~       | hst        | 0.008    |
| ACQUISITION |                   | pw90       | 18.000   |
|             |                   | alfa       | 20.000   |
| sw          | 25125.6           | FLAGS      |          |
| at          | 1.199             | il         | n        |
| np          | 60270             | in         | n        |
| fb          | 13800             | dp         | y        |
| bs          | 16                | hs         | nn       |
| d1          | 1.000             | PROCESSING |          |
| nt          | 8000              | lb         | 2.00     |
| ct          | 6000              | fn         | 65536    |
| TRANSMITTER |                   | DISPLAY    |          |
| tn          | C13               | sp         | -649.2   |
| sfrq        | 100.554           | wp         | 21460.3  |
| tof         | 1536.3            | rfl        | 9272.1   |
| tpwr        | 61                | rfp        | 7764.9   |
| pw          | 9.300             | rp         | -44.6    |
| DECOUPLER   |                   | lp         | -379.8   |
| dn          | H1                | PLOT       |          |
| dof         | 0                 | wc         | 250      |
| dm          | vvy               | sc         | 0        |
| dmm         | w                 | vs         | 50       |
| dpwr        | 42                | th         | 3        |
| dmf         | 8900              | nm         | no       |
|             |                   | ph         | 3        |

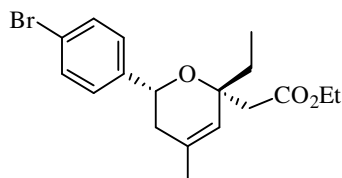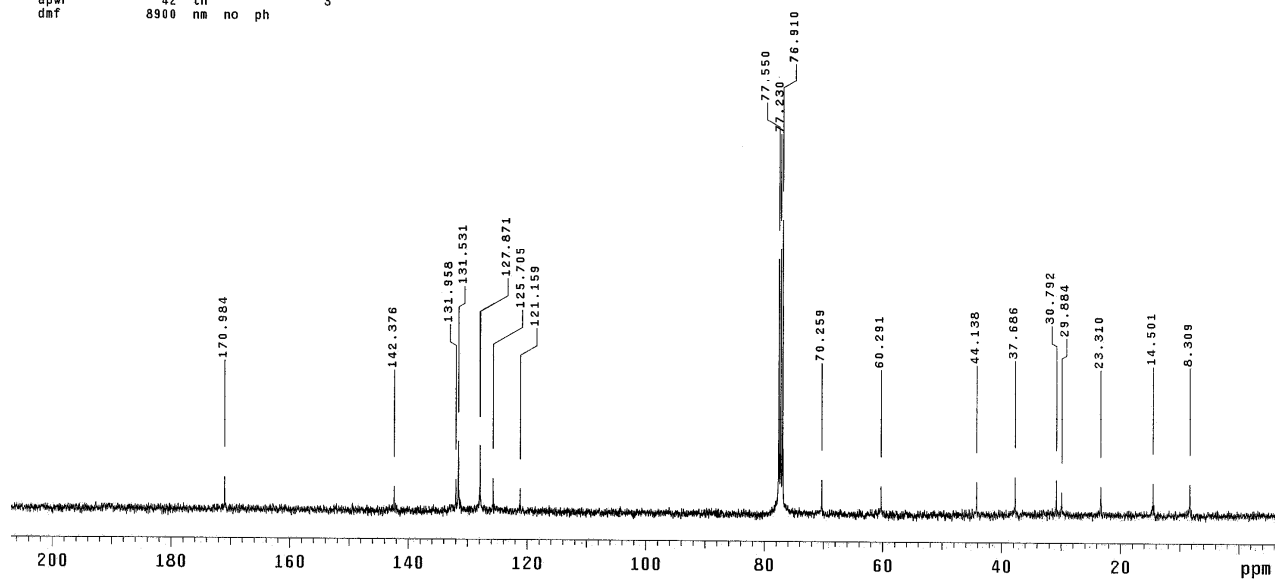



### <sup>1</sup>H NMR spectra of **3n**

PS\_591\_M

exp1 s2pu1

| SAMPLE              |                | SPECIAL    |          |
|---------------------|----------------|------------|----------|
| date                | Feb 18 2012    | temp       | not used |
| solvent             | CDCl3          | gain       | not used |
| file                | /export/home/~ | spin       | not used |
| ciftemp/AKS_PS_591~ | hst            |            | 0.008    |
| _M.fid              | pw90           |            | 19.700   |
| ACQUISITION         | alfa           |            | 20.000   |
| sw                  | 6389.8         | FLAGS      |          |
| at                  | 1.998          | il         | n        |
| np                  | 25328          | in         | n        |
| fb                  | not used       | dp         | y        |
| bs                  | 8              | hs         | nn       |
| d1                  | 1.000          | PROCESSING |          |
| nt                  | 200            | lb         | 0.10     |
| ct                  | 168            | fn         | 65536    |
| TRANSMITTER         |                | DISPLAY    |          |
| tn                  | H1             | sp         | -193.4   |
| sfrq                | 399.853        | wp         | 3551.7   |
| cof                 | 362.8          | rfl        | 789.6    |
| tpwr                | 57             | rfp        | 0        |
| pw                  | 9.850          | rp         | 114.1    |
| DECOUPLER           | lp             |            | -100.4   |
| dn                  | C13            | PLOT       |          |
| dof                 | 0              | wc         | 250      |
| dm                  | nnn            | sc         | 0        |
| dmm                 | c              | vs         | 27       |
| dpwr                | 50             | th         | 16       |
| dmf                 | 15900          | nm         | cdc ph   |

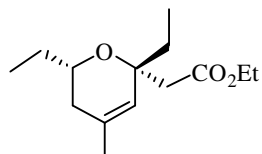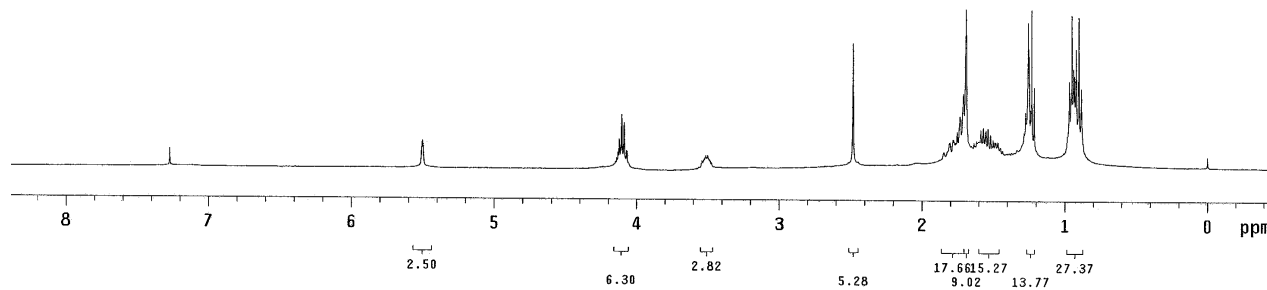

### $^{13}\text{C}$ NMR spectra of **3n**

PS\_591\_M

exp1 s2pu1

| SAMPLE             |               | SPECIAL    |          |
|--------------------|---------------|------------|----------|
| date               | Feb 18 2012   | temp       | not used |
| solvent            | CDCl3         | gain       | not used |
| file               | /export/home/ | spin       | not used |
| ciftemp/AKS_PS_591 | hst           |            | 0.008    |
| M_C13.fid          | pw90          |            | 18.600   |
| ACQUISITION        | alfa          |            | 20.000   |
| sw                 | 25125.6       | FLAGS      |          |
| at                 | 1.199         | il         | n        |
| np                 | 60270         | in         | n        |
| fb                 | 13800         | dp         | y        |
| bs                 | 16            | hs         | nn       |
| d1                 | 1.000         | PROCESSING |          |
| nt                 | 5000          | lb         | 2.00     |
| ct                 | 3040          | fn         | 65536    |
| TRANSMITTER        | C13           | sp         | -778.7   |
| sfrq               | 100.554       | wp         | 21790.8  |
| tof                | 1536.3        | rfl        | 9269.8   |
| tpwr               | 61            | rfl        | 7764.9   |
| pw                 | 9.300         | rp         | -44.3    |
| DECOUPLER          | H1            | lp         | -382.8   |
| dn                 |               | PLOT       |          |
| dcf                | 0             | wc         | 250      |
| dm                 | yyy           | sc         | 0        |
| dmm                | wy            | vs         | 40       |
| dpwr               | 42            | th         | 3        |
| dmf                | 8900          | nm         | no ph    |

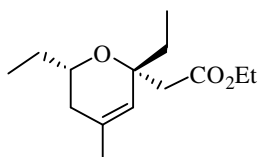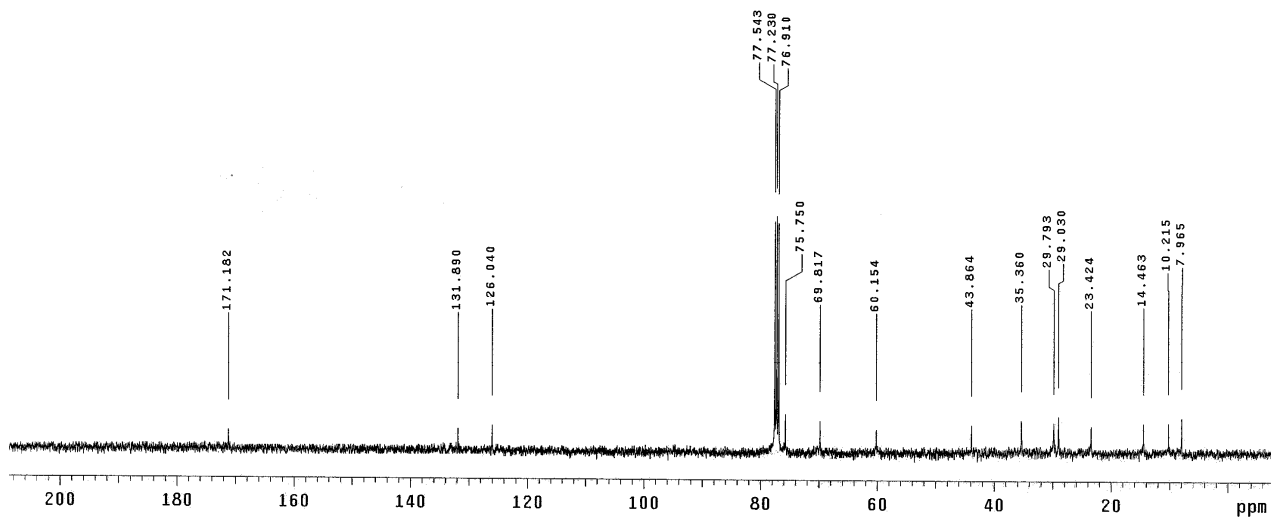

### <sup>1</sup>H NMR spectra of **3o**

```
PS_589_M
exp1 s2pu1

SAMPLE          SPECIAL
date    Feb 12 2012  temp    not used
solvent  CDCl3      gain    not used
file    /export/home/~  spin    not used
ciftemp/AKS_PS_589~  hst     0.008
M_Pdt.fid  pw90    19.700
ACQUISITION  alfa    20.000
sw       6389.8
at       1.998  il      FLAGS    n
np       25528  in      n
fb       not used  dp      y
bs       8     hs      nn
dl       1.000
nt       100   lb      PROCESSING  0.10
ct       88   fn      65536
TRANSMITTER  H1    sp      DISPLAY  -215.5
sfrq       399.853  wp      3560.0
tof        362.8  rfl     786.3
tpwr        57   rfp     0
pw         9.850  rp     109.6
DECOUPLER  C13   lp     -95.0
dn         0     wc      PLOT     250
dof        nn   sc      0
dmm        c    vs     34
dpwr       50   th     20
dmf       15900 nm  cdc  ph
```

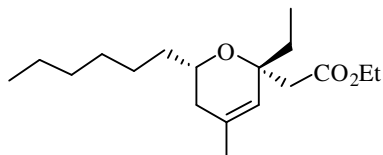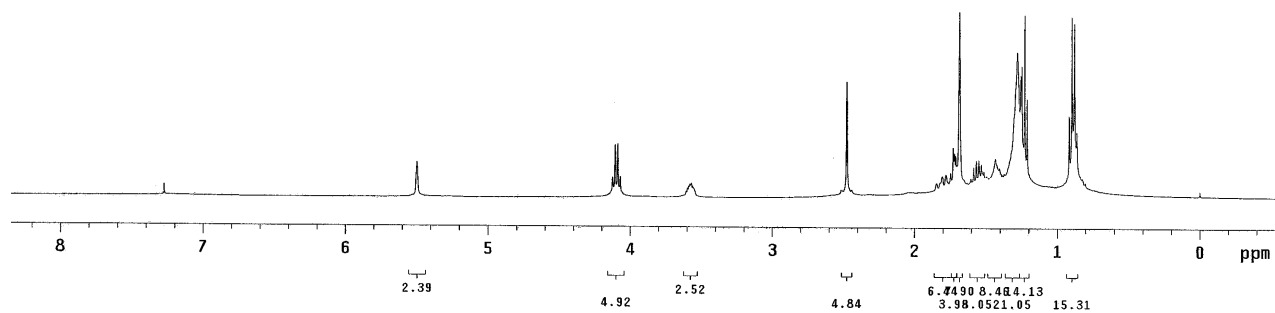

### $^{13}\text{C}$ NMR spectra of **30**

PS\_589\_M

exp1 s2pu1

| SAMPLE      |                   | SPECIAL    |          |
|-------------|-------------------|------------|----------|
| date        | Feb 12 2012       | temp       | not used |
| solvent     | CDCl <sub>3</sub> | gain       | not used |
| file        | /export/home/~    | spin       | not used |
| ciftemp     | AKS_PS_589~       | hst        | 0.008    |
| M_C13.fid   |                   | pw90       | 18.600   |
| ACQUISITION | alfa              |            | 20.000   |
| sw          | 25125.6           | FLAGS      |          |
| at          | 1.199             | il         | n        |
| np          | 60270             | in         | n        |
| fb          | 13800             | dp         | y        |
| bs          | 16                | hs         | nn       |
| d1          | 1.000             | PROCESSING |          |
| nt          | 5000              | lb         | 2.00     |
| ct          | 1568              | fn         | 65536    |
| TRANSMITTER |                   | DISPLAY    |          |
| tn          | C13               | sp         | -482.8   |
| sfrq        | 100.554           | wp         | 21163.6  |
| tof         | 1536.3            | rfl        | 9270.6   |
| tpwr        | 61                | rfp        | 7764.9   |
| pw          | 9.300             | rp         | -89.7    |
| DECOUPLER   |                   | lp         | -271.4   |
| dn          | H1                | PLOT       |          |
| scf         | 0                 | wc         | 250      |
| dm          | yy                | sc         | 0        |
| dmm         | w                 | vs         | 22       |
| dpwr        | 42                | th         | 3        |
| dmf         | 8900              | nm         | no       |
|             |                   | ph         |          |

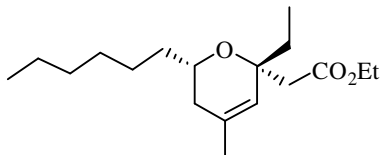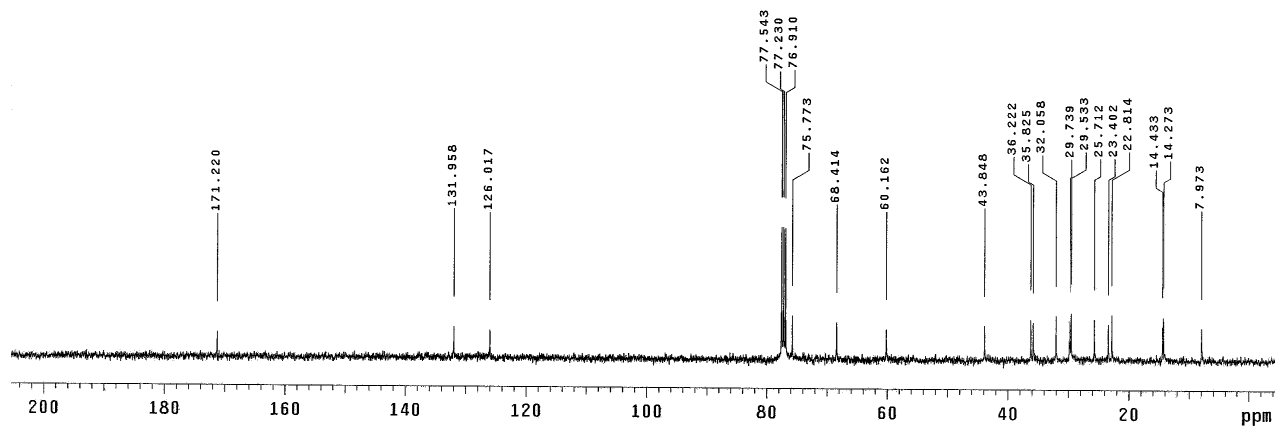

### $^1\text{H}$ NMR spectra of **7b**

PS\_594\_M

exp1 s2pu1

```
SAMPLE          SPECIAL
date    Feb 24 2012  temp      not used
solvent  CDCl3      gain      not used
file     /export/home/~ spin     not used
ciftemp/AKS_PS_594~ hst       0.008
          .M.fid     pw90      19.700
ACQUISITION  alfa     20.000
sw       6389.8      FLAGS
at       1.998      il       n
np       25528      in       n
fb       not used   dp       y
bs       0         hs       nn
d1       1.000
nt       200       lb       0.10
ct       200       fn       65536
TRANSMITTER  H1      sp       -238.9
sfrq       399.853  wp       3652.5
tof        362.8    rfl      792.9
tpwr       57      rfp      0
pw         9.850    rp       115.9
DECOUPLER  C13      lp       -100.4
dn         0
dof        0       wc       250
dm         nnn     sc       0
dmm        c      vs       34
dpwr       50     th       6
dmf        15900  nm      cdc  ph
```

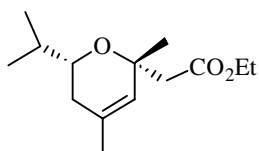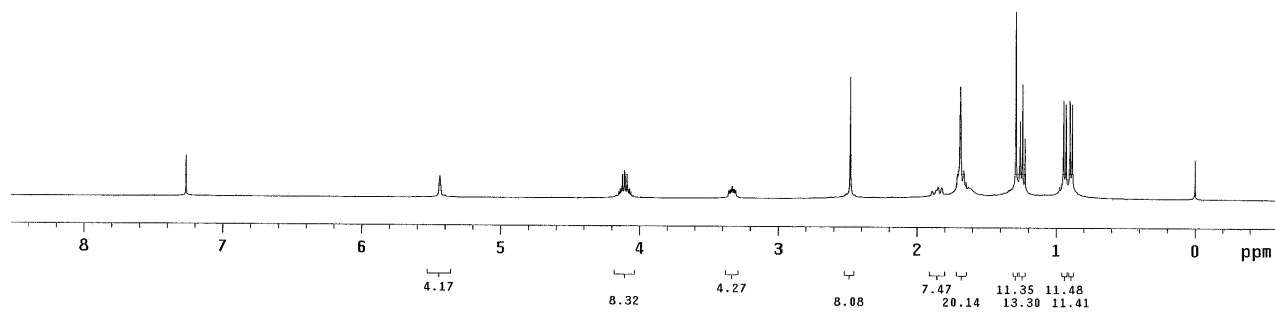

### $^{13}\text{C}$ NMR spectra of **7b**

PS\_594\_M

expl s2pu1

| SAMPLE        |                     | SPECIAL    |          |
|---------------|---------------------|------------|----------|
| date          | Feb 25 2012         | temp       | not used |
| solvent       | CDCl3               | gain       | not used |
| file          | /export/home/~ spin | not used   |          |
| ciftemp       | AKS_PS_594~         | hst        | 0.008    |
| M_Pdt_C13.fid |                     | pw90       | 18.600   |
| ACQUISITION   | alfa                |            | 20.000   |
| sw            | 25125.6             | FLAGS      |          |
| at            | 1.199               | fl         | n        |
| np            | 60270               | in         | n        |
| Fb            | 13800               | dp         | y        |
| bs            | 16                  | hs         | nn       |
| di            | 1.000               | PROCESSING |          |
| nt            | 4000                | lb         | 2.00     |
| ct            | 2000                | fn         | 65536    |
| TRANSMITTER   | C13                 | sp         | -714.3   |
| sfrq          | 100.554             | wp         | 21592.2  |
| tof           | 1536.3              | rfl        | 9271.3   |
| tpwr          | 61                  | rffp       | 7764.9   |
| pw            | 9.300               | rp         | -88.9    |
| DECOUPLER     | H1                  | lp         | -271.4   |
| dn            | 0                   | wc         | 250      |
| dof           | 0                   | sc         | 0        |
| dm            | yyy                 | vs         | 14       |
| dmm           | w                   | th         | 3        |
| dpwr          | 42                  | no         | ph       |
| dmf           | 8900                |            |          |

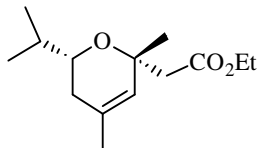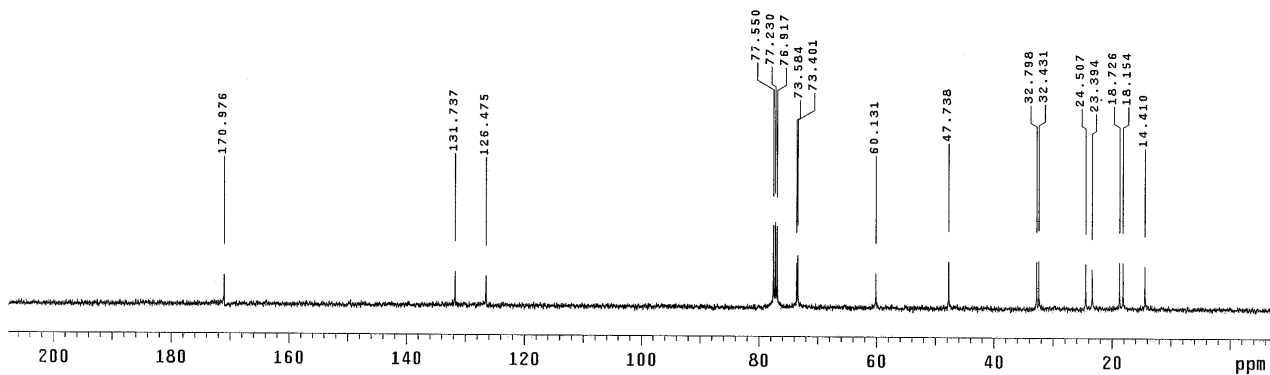

### <sup>1</sup>H NMR spectra of 7c

PS\_595\_M

exp1 s2pu1

|             |                |            |          |
|-------------|----------------|------------|----------|
| SAMPLE      |                | SPECIAL    |          |
| date        | Feb 25 2012    | temp       | not used |
| solvent     | CDCl3          | gain       | not used |
| file        | /export/home/~ | spin       | not used |
| ciftemp     | AKS_PS_595     | hst        | 0.008    |
|             | _M.Fid         | pu90       | 19.700   |
|             |                | alra       | 20.000   |
| ACQUISITION |                | FLAGS      |          |
| sw          | 6389.8         |            |          |
| at          | 1.998          | il         | n        |
| np          | 25528          | in         | n        |
| fb          | not used       | dp         | y        |
| bs          | 8              | hs         | nn       |
| dl          | 1.000          | PROCESSING |          |
| nt          | 300            | lb         | 0.10     |
| ct          | 264            | fn         | 65536    |
| TRANSMITTER |                | DISPLAY    |          |
| tn          | H1             | sp         | -181.9   |
| sfrq        | 399.853        | wp         | 3576.8   |
| tof         | 362.8          | rfl        | 794.8    |
| tpwr        | 57             | rff        | 0        |
| pw          | 9.850          | rp         | 108.6    |
|             |                | lp         | -88.8    |
| DECOUPLER   |                | PLOT       |          |
| dn          | C13            | wc         | 250      |
| dof         | 0              | sc         | 0        |
| dm          | nm             | vs         | 27       |
| dpwr        | 50             | th         | 4        |
| dmf         | 15900          | nm         | cdc ph   |

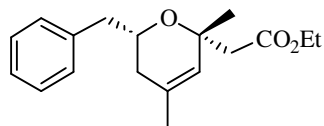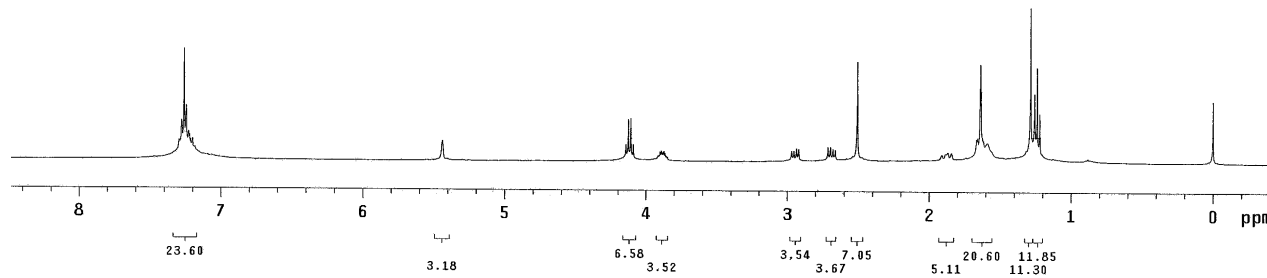

### $^{13}\text{C}$ NMR spectra of 7c

PS\_595\_M

exp1 s2pu1

| SAMPLE      |                   | SPECIAL    |          |
|-------------|-------------------|------------|----------|
| date        | Feb 25 2012       | temp       | not used |
| solvent     | CDCl <sub>3</sub> | gain       | not used |
| file        | /export/home/~    | spin       | not used |
| ciftemp     | /AKS_PS_595~      | hst        | 0.008    |
|             | W_C13.fid         | pw90       | 18.600   |
|             | alfa              |            | 20.000   |
| ACQUISITION |                   | FLAGS      |          |
| sw          | 25125.6           |            |          |
| at          | 1.199             | il         | n        |
| np          | 60270             | in         | n        |
| fb          | 13800             | dp         | y        |
| bs          | 16                | hs         | nn       |
| d1          | 1.000             | PROCESSING |          |
| nt          | 5000              | lb         | 2.00     |
| ct          | 2240              | fn         | 65536    |
| TRANSMITTER |                   | DISPLAY    |          |
| tn          | C13               | sp         | -756.5   |
| sfrq        | 100.554           | wp         | 21691.1  |
| tof         | 1536.3            | rfl        | 9280.5   |
| tpwr        | 61                | rfp        | 7764.9   |
| pw          | 9.300             | rp         | -76.1    |
| DECOUPLER   |                   | lp         |          |
| dn          | H1                |            | -301.3   |
| PLOT        |                   |            |          |
| dof         | 0                 | wc         | 250      |
| dm          | yyy               | sc         | 0        |
| dmm         | w                 | vs         | 13       |
| dpmr        | 42                | th         | 2        |
| dmaf        | 8900              | nm         | no ph    |

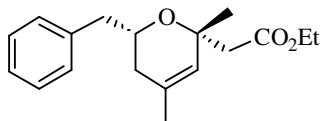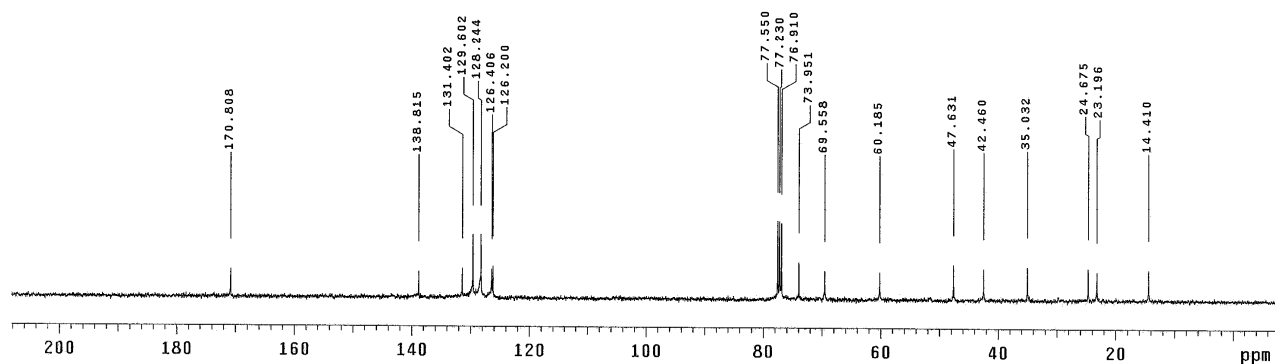



### <sup>1</sup>H NMR spectra of 7d

PS\_604\_M

exp1 s2pu1

| SAMPLE              |                | SPECIAL |          |
|---------------------|----------------|---------|----------|
| date                | Mar 11 2012    | temp    | not used |
| solvent             | CDCl3          | gain    | not used |
| file                | /export/home/~ | spin    | not used |
| ciftemp/AKS_PS_604~ | hst            |         | 0.008    |
| ACQUISITION         | M.fid          | pw90    | 19.700   |
|                     | alfa           |         | 20.000   |
| sw                  | 6389.8         |         |          |
| at                  | 1.998          | il      | n        |
| np                  | 25528          | in      | n        |
| fb                  | not used       | dp      | y        |
| bs                  | 8              | hs      | nn       |
| d1                  | 1.000          |         |          |
| nt                  | 200            | lb      | 0.10     |
| ct                  | 176            | fn      | 65536    |
| TRANSMITTER         | H1             | sp      | -173.2   |
| sfrq                | 399.853        | wp      | 3543.3   |
| tof                 | 362.8          | rfl     | 794.5    |
| tpwr                | 9.57           | rfp     | 0        |
| pw                  | 9.850          | rp      | 104.1    |
| DECOUPLER           | C13            | lp      | -84.7    |
| dn                  | 0              |         |          |
| dof                 | 0              | wc      | 250      |
| dm                  | nnn            | sc      | 0        |
| dmm                 | c              | vs      | 44       |
| dpwr                | 50             | th      | 6        |
| dmf                 | 15900          | nm      | cdc ph   |

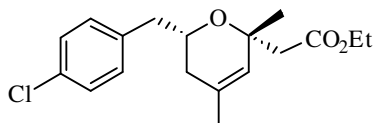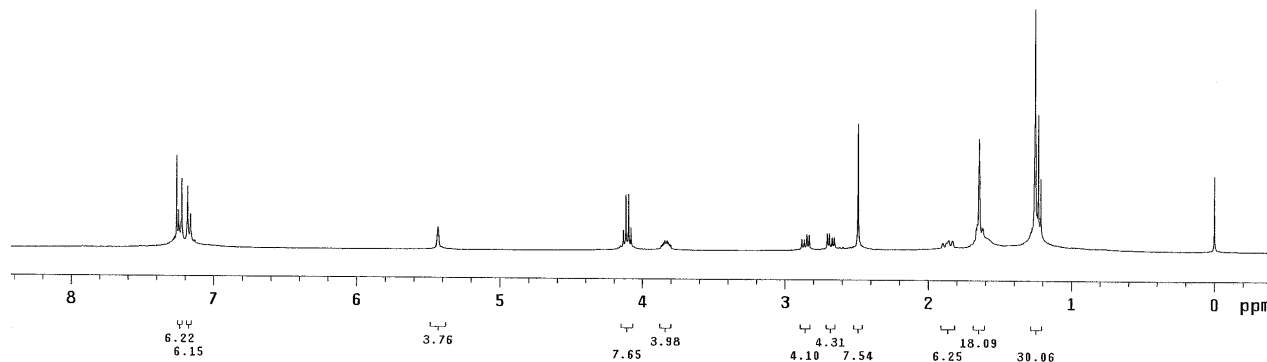

### <sup>13</sup>C NMR spectra of 7d

PS\_604\_M

exp1 s2pu1

|             |                |            |          |
|-------------|----------------|------------|----------|
| SAMPLE      |                | SPECIAL    |          |
| date        | Mar 12 2012    | temp       | not used |
| solvent     | CDC13          | gain       | not used |
| file        | /export/home/~ | spin       | not used |
| ciftemp     | AKS_PS_604~    | hst        | 0.008    |
| M1_C13.fid  | pw90           | 18.600     |          |
| ACQUISITION | alfa           | 20.000     |          |
| sw          | 25125.6        | FLAGS      | n        |
| at          | 1.199          | il         | n        |
| np          | 60270          | in         | n        |
| fb          | 13800          | dp         | y        |
| bs          | 16             | hs         | nn       |
| d1          | 1.000          | PROCESSING | 2.00     |
| nt          | 5000           | lb         | 65536    |
| ct          | 3424           | fn         |          |
| TRANSMITTER | C13            | sp         | -815.6   |
| sfrq        | 100.554        | wp         | 21955.7  |
| tof         | 1536.3         | rfl        | 9272.1   |
| tpwr        | 61             | rffp       | 7764.9   |
| pw          | 9.300          | rp         | -90.0    |
| DECOUPLER   | H1             | lp         | -271.4   |
| dn          | 0              | PLOT       | 250      |
| dof         | 0              | wc         | 0        |
| dm          | yvy            | sc         | 0        |
| dmm         | w              | vs         | 24       |
| dpwr        | 42             | th         | 2        |
| dmf         | 8900           | nm         | no ph    |

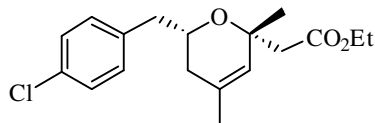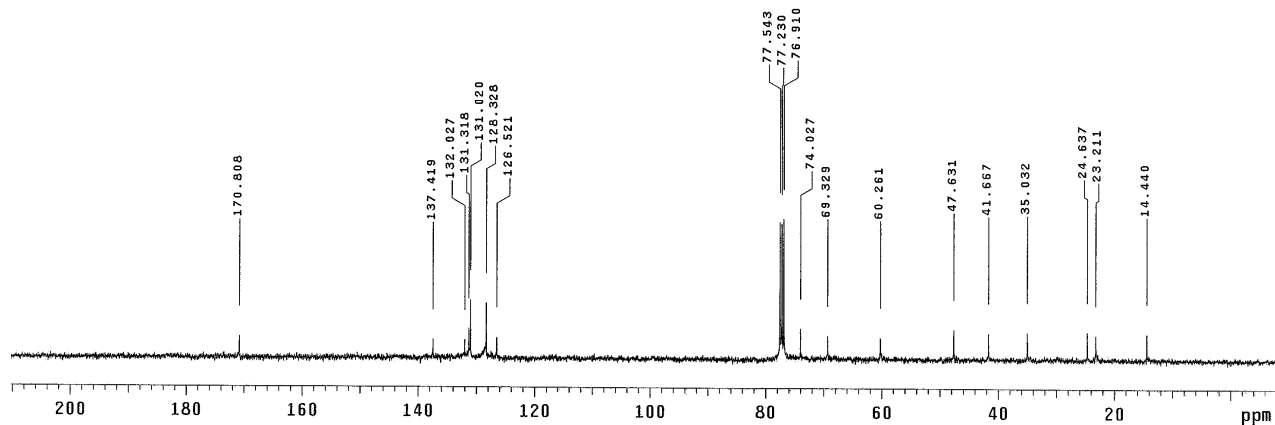

### <sup>1</sup>H NMR spectra of 7e

PS\_596\_M

exp1 s2pu1

|             |                |            |          |
|-------------|----------------|------------|----------|
| SAMPLE      |                | SPECIAL    |          |
| date        | Feb 28 2012    | temp       | not used |
| solvent     | CDC13          | gain       | not used |
| file        | /export/home/~ | spin       | not used |
| ciftemp     | AKS_PS_596~    | hst        | 0.008    |
| M_Pdt.fid   | pw90           |            | 19.700   |
| ACQUISITION | alFa           |            | 20.000   |
| sw          | 6389.8         | FLAGS      |          |
| at          | 1.998          | il         | n        |
| np          | 25528          | in         | n        |
| fb          | not used       | dp         | y        |
| bs          | 8              | hs         | nn       |
| d1          | 1.000          | PROCESSING |          |
| nt          | 200            | lb         | 0.10     |
| ct          | 200            | fn         | 65536    |
| TRANSMITTER |                | DISPLAY    |          |
| tn          | H1             | sp         | -248.8   |
| sfrq        | 399.853        | wp         | 3677.6   |
| tof         | 362.8          | rfl        | 794.5    |
| tpwr        | 57             | rfp        | 0        |
| pw          | 9.850          | rp         | 98.8     |
| DECOUPLER   | lP             |            | -81.9    |
| dn          | C13            | PLOT       |          |
| dof         | 0              | wc         | 250      |
| dm          | nnn            | sc         | 0        |
| dmm         | c              | vs         | 39       |
| dpwr        | 50             | th         | 10       |
| dmf         | 15900          | nm         | cdc ph   |

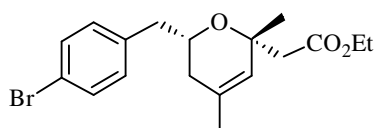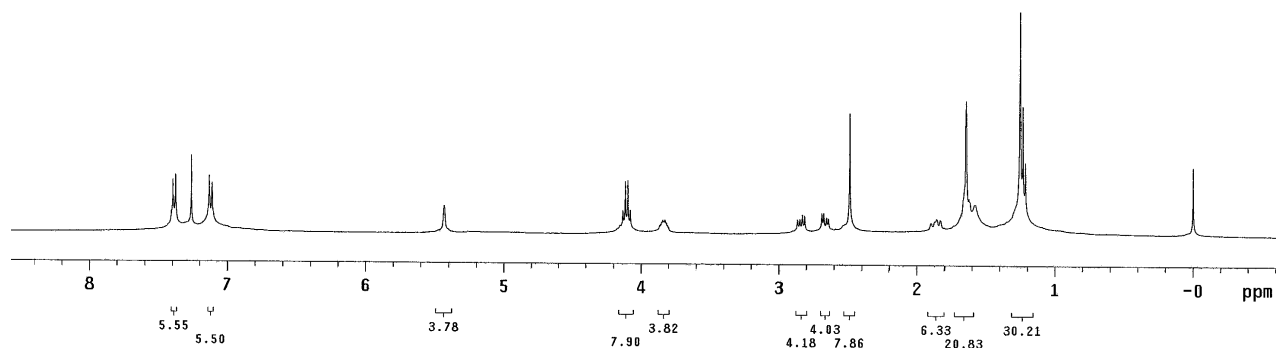

### $^{13}\text{C}$ NMR spectra of **7e**

PS\_596\_M

exp1 s2pu1

| SAMPLE      |                   | SPECIAL    |          |
|-------------|-------------------|------------|----------|
| date        | Feb 26 2012       | temp       | not used |
| solvent     | CDCl <sub>3</sub> | gain       | not used |
| file        | /export/home/~    | spin       | not used |
| ciftemp     | AKS_PS_596        | hst        | 0.008    |
|             | M_C13.fid         | pw90       | 18.600   |
| ACQUISITION | alfa              |            | 20.000   |
| sw          | 25125.6           | FLAGS      |          |
| at          | 1.199             | il         | n        |
| np          | 60270             | in         | n        |
| fb          | 13800             | dp         | y        |
| bs          | 16                | hs         | nn       |
| d1          | 1.000             | PROCESSING |          |
| nt          | 4000              | lb         | 2.00     |
| ct          | 4000              | fn         | 65536    |
| TRANSMITTER | C13               | DISPLAY    |          |
| tn          |                   | sp         | -655.3   |
| sfrq        | 100.554           | wp         | 21361.4  |
| tof         | 1536.3            | rfl        | 9278.2   |
| tpwr        | 61                | rfd        | 7764.9   |
| pw          | 9.300             | rp         | -64.4    |
| DECOUPLER   | H1                | lp         | -349.1   |
| dn          |                   | PLOT       |          |
| dof         | 0                 | wc         | 250      |
| dmm         | yyv               | sc         | 0        |
| dmm         | w                 | vs         | 22       |
| dpr         | 42                | th         | 3        |
| dmf         | 8900              | nm         | no ph    |

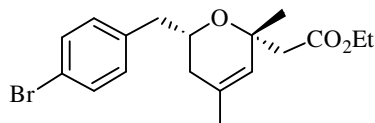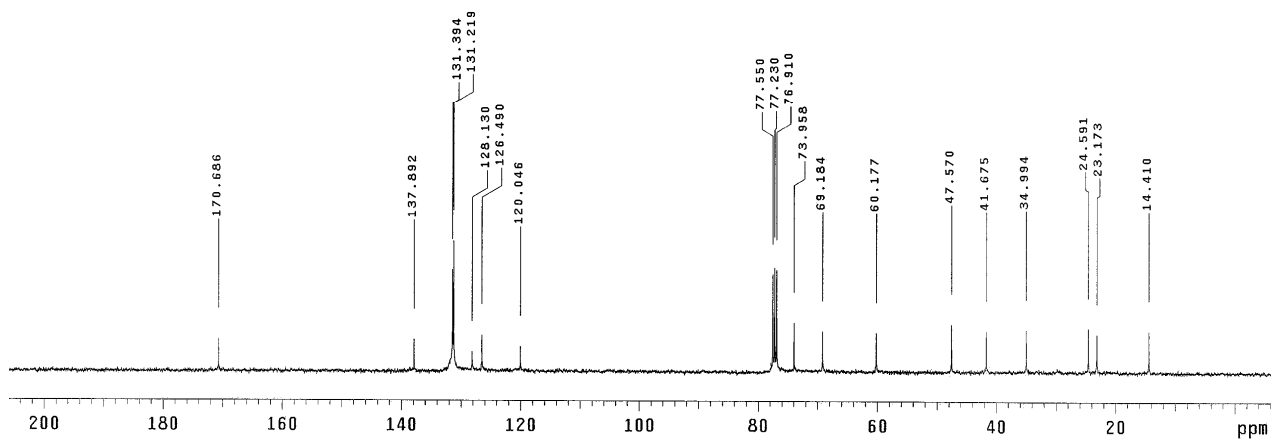

### <sup>1</sup>H NMR spectra of 7f

PS\_607\_M

exp1 s2pu1

| SAMPLE              |                | SPECIAL    |          |
|---------------------|----------------|------------|----------|
| date                | Mar 24 2012    | temp       | not used |
| solvent             | CDCl3          | gain       | not used |
| file                | /export/home/~ | spin       | not used |
| ciftemp/AKS_PS_607~ | hst            |            | 0.008    |
|                     | M.fid          | pv90       | 19.700   |
| ACQUISITION         | alfa           |            | 20.000   |
| sw                  | 6389.8         | FLAGS      |          |
| at                  | 1.998          | fl         | n        |
| np                  | 25528          | in         | n        |
| fb                  | not used       | dp         | y        |
| bs                  | 8              | hs         | nn       |
| dl                  | 1.000          | PROCESSING |          |
| nt                  | 200            | lb         | 0.10     |
| ct                  | 200            | fn         | 65536    |
| TRANSMITTER         | H1             | sp         | -249.6   |
| sfrq                | 399.853        | wp         | 3652.5   |
| tof                 | 362.8          | rfl        | 795.2    |
| tpwr                | 57             | rfp        | 0        |
| pw                  | 9.850          | rp         | 104.9    |
| DECOUPLER           | C13            | lp         | -84.8    |
| dn                  |                | PLOT       |          |
| dof                 | 0              | wc         | 250      |
| dm                  | nnn            | sc         | 0        |
| dmm                 | c              | vs         | 36       |
| dpwr                | 50             | th         | 5        |
| dmf                 | 15900          | nm         | cdc ph   |

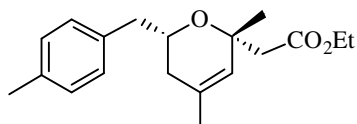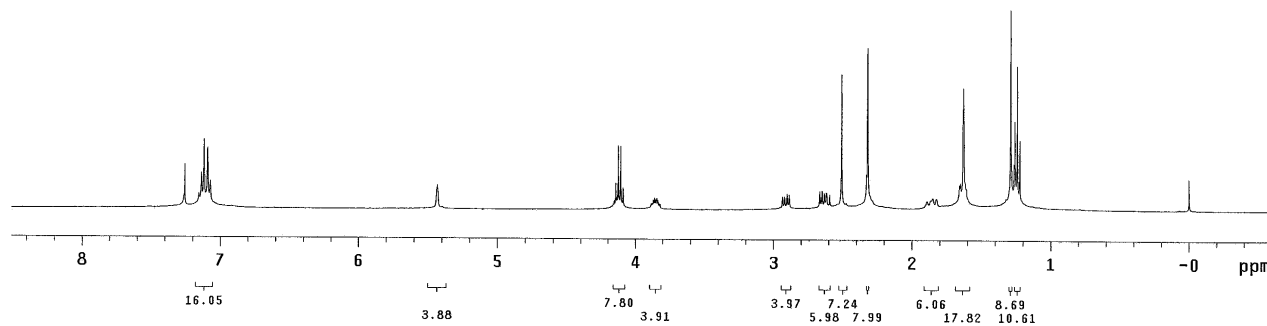

### $^{13}\text{C}$ NMR spectra of **7f**

PS\_607\_M

expl s2pu1

| SAMPLE      |                   | SPECIAL    |          |
|-------------|-------------------|------------|----------|
| date        | Mar 24 2012       | temp       | not used |
| solvent     | CDCl <sub>3</sub> | gain       | not used |
| file        | /export/home/~    | spin       | not used |
| ciftemp     | AKS_PS_607~       | hst        | 0.008    |
|             | M_C13.fid         | pw90       | 18.600   |
|             |                   | alfa       | 20.000   |
| ACQUISITION |                   | FLAGS      |          |
| sw          | 25125.6           |            |          |
| at          | 1.199             | fl         | n        |
| np          | 60270             | in         | n        |
| fb          | 13800             | dp         | y        |
| bs          | 16                | hs         |          |
| d1          | 1.000             | PROCESSING |          |
| nt          | 4000              | lb         | 2.00     |
| ct          | 2464              | fn         | 65536    |
| TRANSMITTER |                   | DISPLAY    |          |
| tn          | C13               | sp         | -620.8   |
| sfrq        | 100.554           | wp         | 21460.3  |
| tof         | 1536.3            | rf1        | 9276.7   |
| tpwr        | 61                | rfp        | 7764.9   |
| pw          | 9.300             | rp         | -53.9    |
| DECOUPLER   |                   | PLOT       |          |
| dn          | H1                | lp         | -355.9   |
| dof         | 0                 | wc         | 250      |
| dm          | vyv               | sc         | 0        |
| dmm         | w                 | vs         | 24       |
| dpwr        | 42                | th         | 4        |
| dmf         | 8900              | nm         | no ph    |

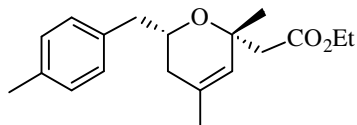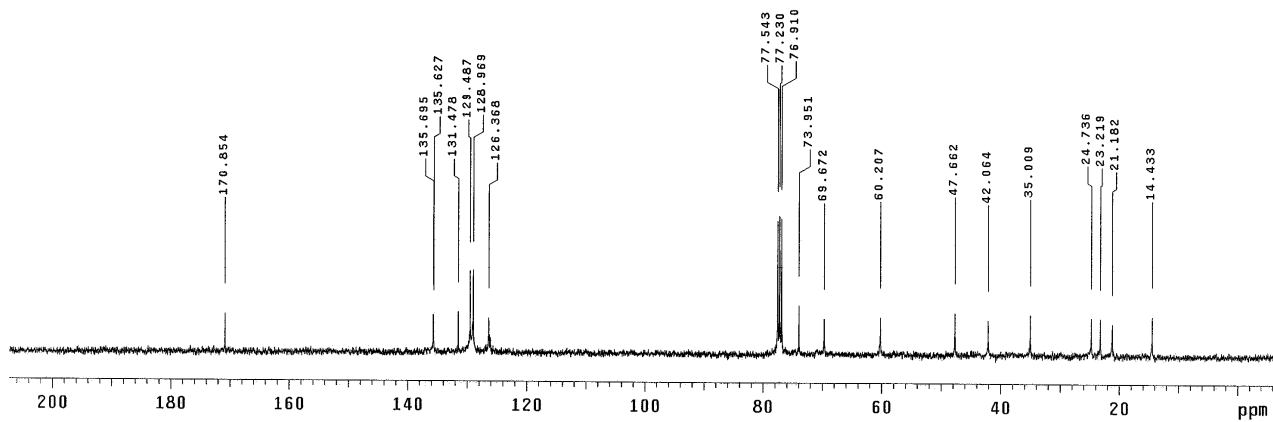

### <sup>1</sup>H NMR spectra of **7g**

PS\_598\_M

exp1 std1h

```
SAMPLE          SPECIAL
date Mar 1 2012 temp not used
solvent CDCl3 gain not used
file /export/home/ spin not used
ciftemp/AKS_PS_598 hst 0.008
_M_fid pw90 19.700
ACQUISITION alfa 20.000
sw 6006.0 FLAGS
at 1.995 il n
np 23964 in n
fb not used dp y
bs 8 hs nn
dl 1.000 PROCESSING
nt 200 fn not used
ct 128 DISPLAY
TRANSMITTER sp -174.9
tn H1 wp 3575.1
cfrq 399.853 rfl 363.0
tof 0 rfp 0
tpwr 57 rp 97.6
pw 7.000 lp -77.1
DECOUPLER C13 PLOT
dn C13 wc 250
dof 0 sc 0
dm nnn vs 22
dmm c th 6
dpwr 50 nm cdc ph
dmf 15900
```

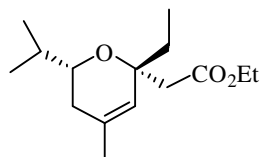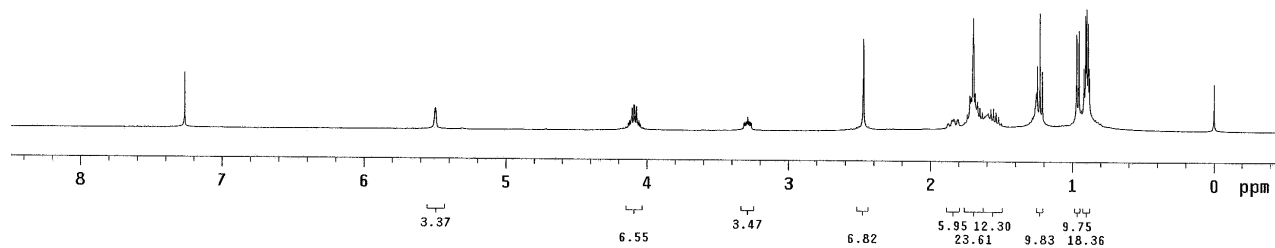

### $^{13}\text{C}$ NMR spectra of **7g**

PS\_598\_M

expl s2pu1

```
SAMPLE          SPECIAL
date Mar 2 2012 temp      not used
solvent CDCl3 gain      not used
file /export/home/~ spin  not used
ciftemp/AKS_PS_598 hst    0.008
M_C13.fid pw90 18.600
ACQUISITION alfa 20.000
sw 25125.6 FLACS
at 1.199 f1 n
np 60270 fn n
fb 13800 dp y
bs 16 hs
dl 1.000 PROCESSING
nt 4000 lb 2.00
ct 1376 fn 65536
TRANSMITTER C13 sp -646.9
sfrq 100.554 wp 21559.3
tof 1536.3 rfi 9269.8
tpwr 61 rfp 7764.9
pw 9.300 rp -92.3
DECOUPLER H1 lp -271.4
dn
dof 0 wc 250
dm yy sc 0
dmm w vs 18
dpwr 42 th 3
dmf 8900 nm no ph
```

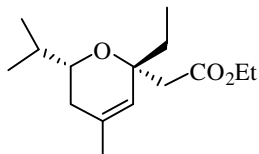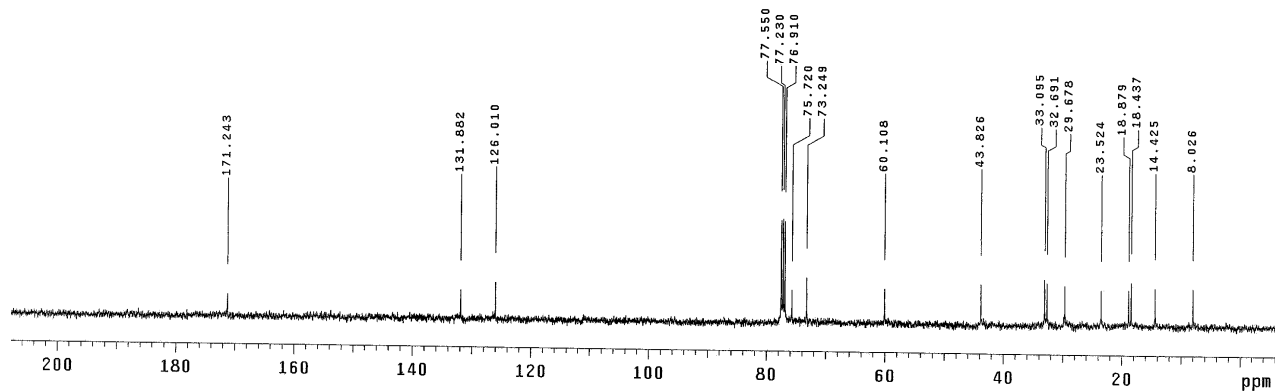



### <sup>1</sup>H NMR spectra of 7h

PS\_599\_U

exp1 s2pu1

|             |                |            |          |
|-------------|----------------|------------|----------|
| SAMPLE      |                | SPECIAL    |          |
| date        | Mar 2 2012     | temp       | not used |
| solvent     | CDCl3          | gain       | not used |
| file        | /export/home/~ | spin       | not used |
| ciftemp     | AKS_PS_599~    | hst        | 0.008    |
|             | M. fid         | pw90       | 19.700   |
|             | alfa           |            | 20.000   |
| ACQUISITION |                | FLAGS      |          |
| sw          | 6389.8         | il         | n        |
| at          | 1.998          | in         | n        |
| np          | 25528          | dp         | y        |
| fb          | not used       | hs         | nn       |
| bs          | 8              |            |          |
| d1          | 1.000          | PROCESSING |          |
| nt          | 200            | lb         | 0.10     |
| ct          | 200            | fn         | 65536    |
| TRANSMITTER |                | DISPLAY    |          |
| tn          | H1             | sp         | -254.3   |
| sfrq        | 399.853        | wp         | 3669.2   |
| tof         | 362.8          | rfl        | 791.5    |
| tpwr        | 57             | rfl        | 0        |
| pw          | 9.850          | rp         | 106.8    |
| DECOUPLER   |                | lp         | -97.5    |
| dn          | C13            | PLOT       |          |
| dof         | 0              | wc         | 250      |
| dm          | nnn            | sc         | 0        |
| dmm         | c              | vs         | 24       |
| dpwr        | 50             | th         | 2        |
| dmt         | 15900          | nm         | cdc ph   |

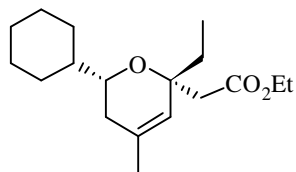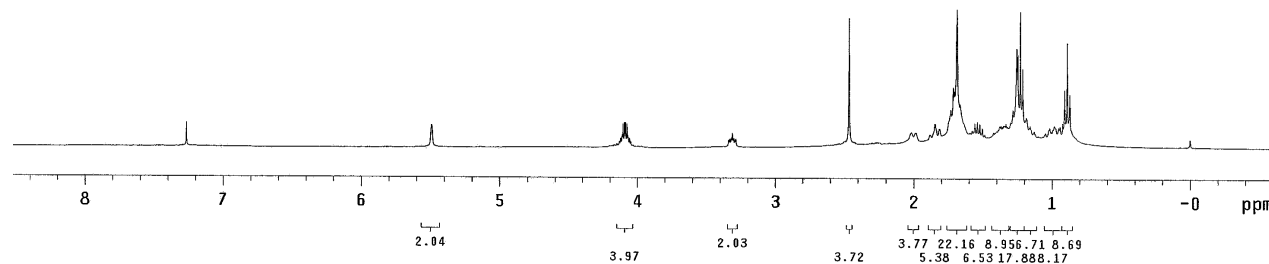

### $^{13}\text{C}$ NMR spectra of **7h**

PS\_599\_M

expl s2pu1

| SAMPLE              |                   | SPECIAL    |          |
|---------------------|-------------------|------------|----------|
| date                | Mar 6 2012        | temp       | not used |
| solvent             | CDCl <sub>3</sub> | gain       | not used |
| file                | /export/home/~    | spin       | not used |
| ciftemp/AKS_PS_599~ |                   | hst        | 0.008    |
| M_C13.fid           |                   | pw90       | 18.600   |
| ACQUISITION         | alfa              | alpha      | 20.000   |
| sw                  | 25125.6           | FLACS      |          |
| at                  | 1.199             | il         | n        |
| np                  | 60270             | in         | n        |
| fb                  | 13800             | dp         | y        |
| bs                  | 16                | hs         | nn       |
| d1                  | 1.000             | PROCESSING |          |
| nt                  | 10000             | lb         | 2.00     |
| ct                  | 10000             | fn         | 65536    |
| TRANSMITTER         |                   | DISPLAY    |          |
| tn                  | C13               | sp         | -579.4   |
| sfrq                | 100.554           | wp         | 21559.3  |
| tof                 | 1536.3            | rfl        | 9268.3   |
| tpwr                | 61                | rfp        | 7764.9   |
| pw                  | 9.300             | rp         | -88.6    |
| DECOUPLER           |                   | lp         | -271.4   |
| dn                  | H1                | PLOT       |          |
| dof                 | 0                 | wc         | 250      |
| dm                  | yyy               | sc         | 0        |
| dmm                 | w                 | vs         | 76       |
| dpwr                | 42                | th         | 3        |
| dmf                 | 8900              | nm         | no ph    |

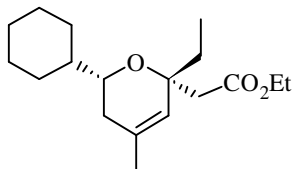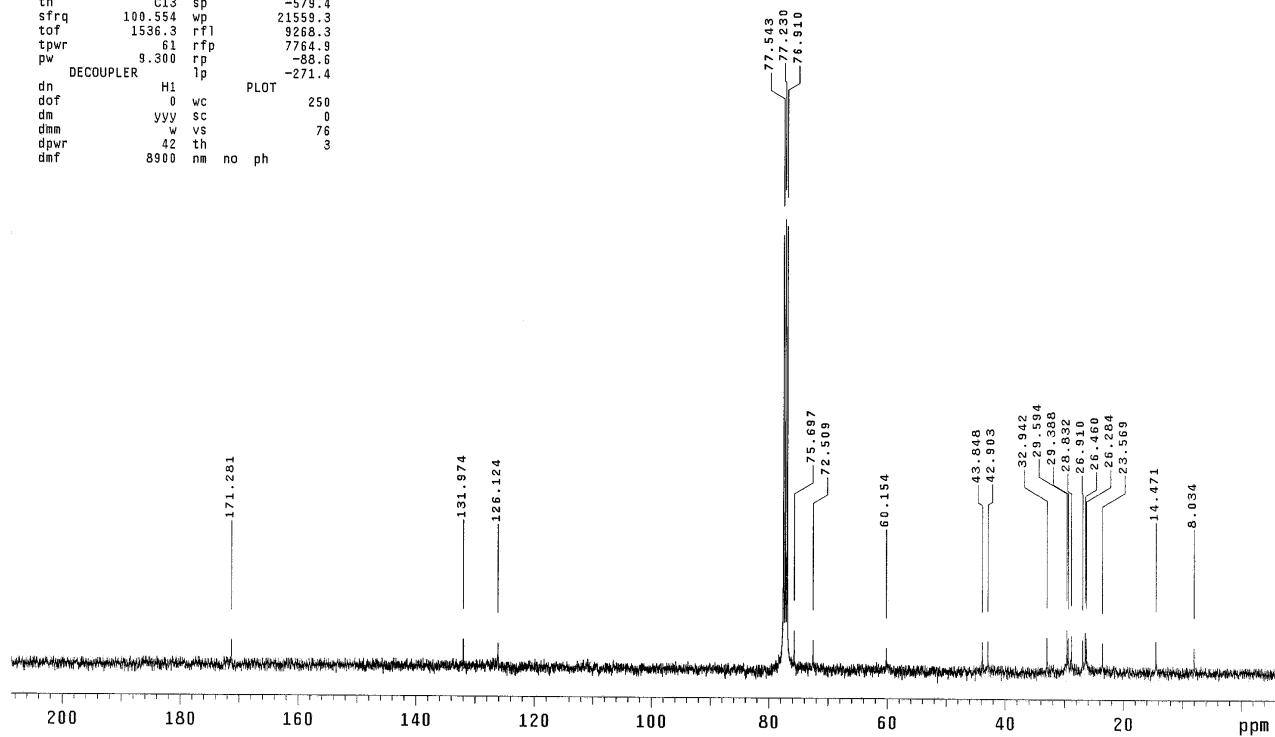

### NOESY spectrum of 3a

PS\_573M\_NOESY

exp1 NOESY

| SAMPLE             |            | FLAGS         |            |
|--------------------|------------|---------------|------------|
| date               | Feb 6 2012 | hs            | n          |
| solvent            | CDC13      | sspul         | y          |
| sample ciftemp_06F | ~          | PGF1g         | y          |
| eb2012-01:45:14    | hsglv1     | SPECIAL       | 2000       |
| ACQUISITION        |            | SPECIAL       |            |
| cw                 | 3191.8     | temp          | not used   |
| at                 | 0.160      | gain          | 2          |
| np                 | 1024       | spin          | 0          |
| fb                 | not used   | F2            | PROCESSING |
| ss                 | 32         | gf            | 9.074      |
| d1                 | 2.000      | gfs           | not used   |
| nt                 | 32         | fn            | 2048       |
| 2D ACQUISITION     |            | F1 PROCESSING |            |
| sw1                | 3191.8     | gf1           | 0.037      |
| ni                 | 128        | gfs1          | not used   |
| TRANSMITTER        |            | PROC1         |            |
| tn                 | H1         | fn1           | 2048       |
| SFRQ               |            | DISPLAY       |            |
| sfrq               | 399.853    | sp            | 403.1      |
| tof                | -237.0     | wp            | 1594.4     |
| tpwr               | 57         | sp1           | 395.3      |
| pw                 | 19.700     | wp1           | 1597.5     |
| mix                | NOESY      | rf1           | -203.4     |
| PRESATURATION      | nnn        | rff           | 0          |
| satmode            | nnn        | rfp           | -201.9     |
| satpwr             | 0          | rffp1         | 0          |
| satdly             | 0          | PLOT          |            |
| satfrq             | 0          | wc            | 155.0      |
| DECOUPLER          |            | sc            | 10.0       |
| dn                 | C13        | wc2           | 155.0      |
| dm                 | nnn        | sc2           | 0          |
|                    |            | vs            | 1036       |
|                    |            | th            | 4          |
|                    |            | ai            | ph         |

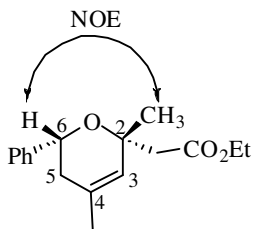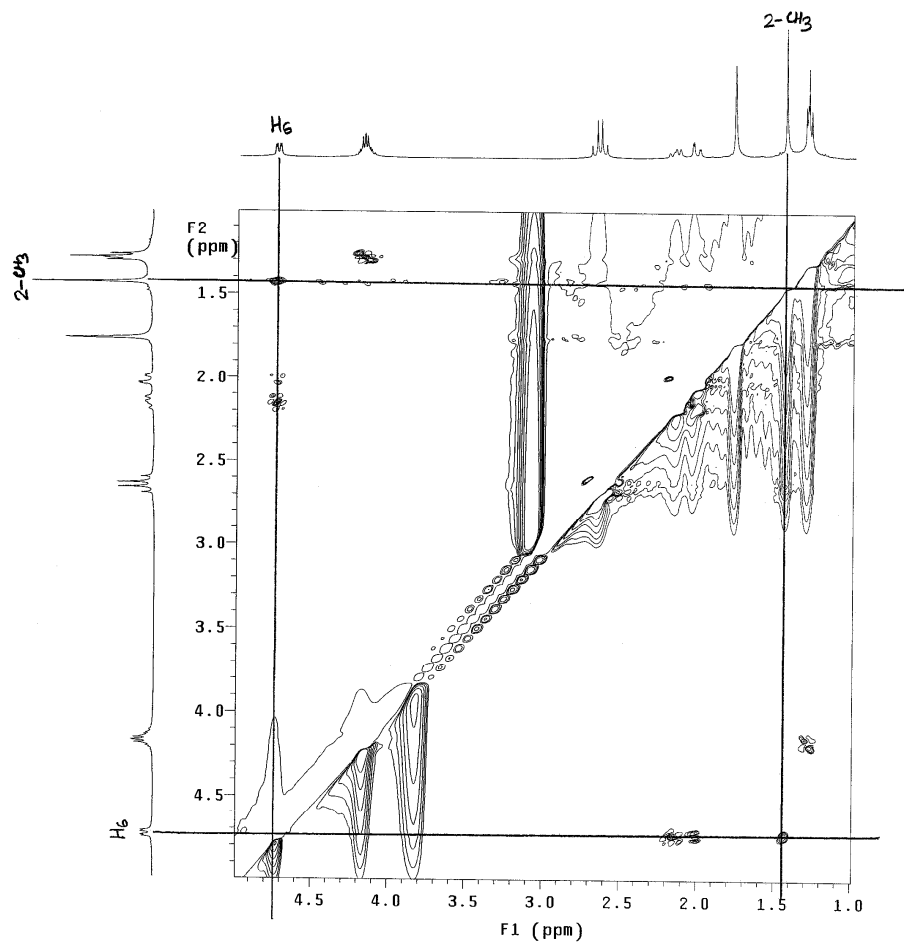

### NOESY spectrum of 3k

PS\_582\_M

exp1 NOESY

```
SAMPLE          FLAGS
date Jun 2 2012 hs          n
solvent CDC13  sspul       y
sample cftemp_02J~ PFGflg  y
un2012 hsglvi 2000

ACQUISITION     SPECIAL
sw 3191.8 temp not used
at 0.160 gain 10
np 1024 spin 0
fb not used F2 PROCESSING
ss 32 gf 0.074
dl 1.000 gfs not used
nt 64 fn 2048

2D ACQUISITION  F1 PROCESSING
sw1 3191.8 gf1 0.037
ni 128 gfs1 not used

TRANSMITTER     proc1 1p
tn H1 fn1 2048
sfrq 399.853 sp DISPLAY
tof -237.0 sp 303.3
tpwr 57 wp 1716.0
pw 19.700 sp1 314.2
NOESY wp1 1700.4
mix 0.200 rfp -203.4
PRESATURATION  rfp 0
satmode nnnn rfl1 -201.9
satpwr 0 rfp1 0
sattdly 0
satfrq 0 wc PLOT
DECOUPLER      sc 124.0
dn C13 wc2 124.0
dm nnn sc2 0
vs 1592
ai th 3
ph
```

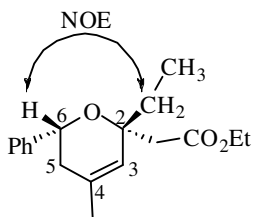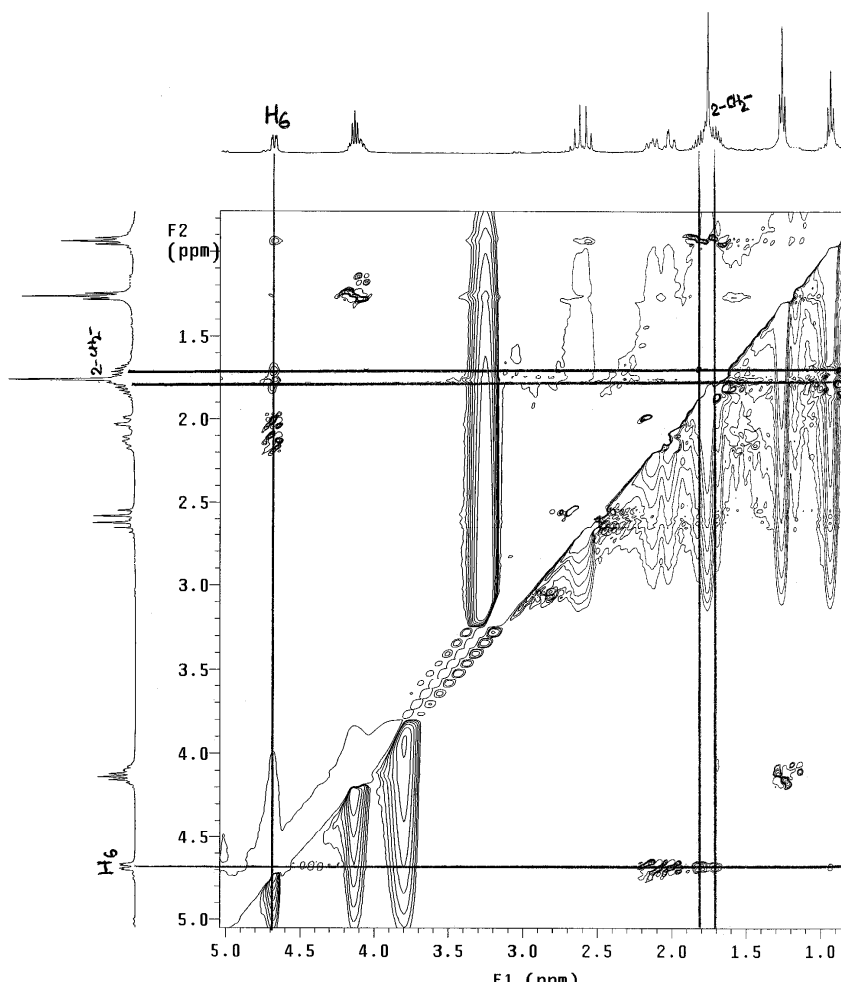

### Crude <sup>1</sup>H NMR spectra of **3c**

PS\_621\_Crude

exp1 s2pu1

| SAMPLE      |                | SPECIAL    |          |
|-------------|----------------|------------|----------|
| date        | Apr 29 2012    | temp       | not used |
| solvent     | CDCl3          | gain       | not used |
| file        | /export/home/~ | spin       | not used |
| ciftemp     | AKS_PS_621~    | hst        | 0.008    |
|             | Crude.fid      | pw90       | 19.700   |
|             |                | alfa       | 20.000   |
| ACQUISITION |                | FLAGS      |          |
| sw          | 6389.8         | il         | n        |
| at          | 1.998          | in         | n        |
| np          | 25528          | dp         | y        |
| fb          | not used       | hs         | nn       |
| bs          | 8              |            |          |
| d1          | 1.000          | PROCESSING |          |
| nt          | 200            | lb         | 0.10     |
| ct          | 80             | fn         | 65536    |
| TRANSMITTER |                | DISPLAY    |          |
| tn          | H1             | sp         | -272.0   |
| sfrq        | 399.653        | wp         | 3744.7   |
| tof         | 362.8          | rfl        | 792.5    |
| tpwr        | 57             | rfp        | 0        |
| pw          | 9.850          | rp         | 105.4    |
|             |                | lp         | -76.4    |
| DECOUPLER   |                | PLOT       |          |
| dn          | C13            | wc         | 250      |
| dof         | 0              | sc         | 0        |
| dm          | nnn            | vs         | 31       |
| dmm         | c              | th         | 20       |
| dpwr        | 50             | nm         | cdc ph   |
| dmf         | 15900          |            |          |

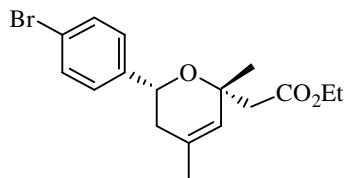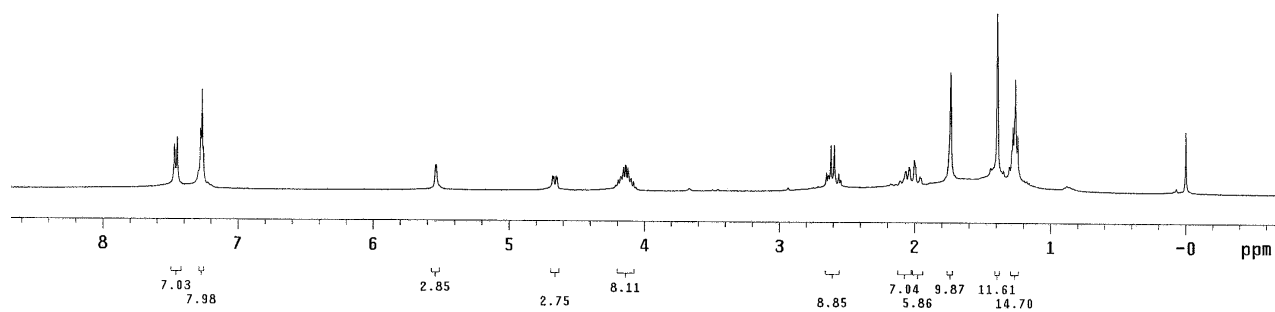

Supplement: c2ob26088c.pdf [file c2ob26088c.pdf]
